# Supplementary material for: Direct synthesis of 2-methylpyridines via I2-triggered [3 + 2 + 1] annulation of aryl methyl ketoxime acetates with triethylamine as the carbon source
Source: Royal Society of Chemistry journal article supplement (doi:10.1039/c8ob00349a), 2018-01-01

## Supporting Information

Direct synthesis of 2-methylpyridines via I<sub>2</sub>-triggered [3 + 2 + 1] annulation of aryl methyl ketoxime acetates with triethylamine as the carbon source

Qinghe Gao,<sup>\*a</sup> Huijuan Yan,<sup>a</sup> Manman Wu,<sup>a</sup> Jiajia Sun,<sup>a</sup> Xiqing Yan,<sup>a</sup> and Anxin Wu<sup>b</sup>

<sup>a</sup>*School of Pharmacy, Xinxiang Medical University, Xinxiang, Henan 453003, P. R. China.*

<sup>b</sup>*Key Laboratory of Pesticide & Chemical Biology, Ministry of Education, College of Chemistry, Central China Normal University, Wuhan 430079, P. R. China.*

E-mail: gao\_qinghe@xxmu.edu.cn

| Table of Contents                                                                   | page   |
|-------------------------------------------------------------------------------------|--------|
| 1. The cross-coupling reaction and the spectrogram of HRMS.....                     | S2     |
| 2. The <sup>13</sup> C-labeling and D-labeling experiments and the spectrogram..... | S2-S4  |
| 3. The HSQC and HMBC of <b>3d</b> .....                                             | S5     |
| 4. <sup>1</sup> H and <sup>13</sup> C NMR spectra of compounds <b>3</b> .....       | S6-S25 |

## 1. The cross-coupling reaction and the spectrogram of HRMS

In order to further confirm our proposed mechanism, we investigated the cross-coupling reaction between two representative substrates 4-methylacetophenone oxime acetate (**1a**) and acetophenone oxime acetate (**1f**) under standard conditions. Fortunately, all the products were successfully identified by HRMS analysis of the crude reaction extract.

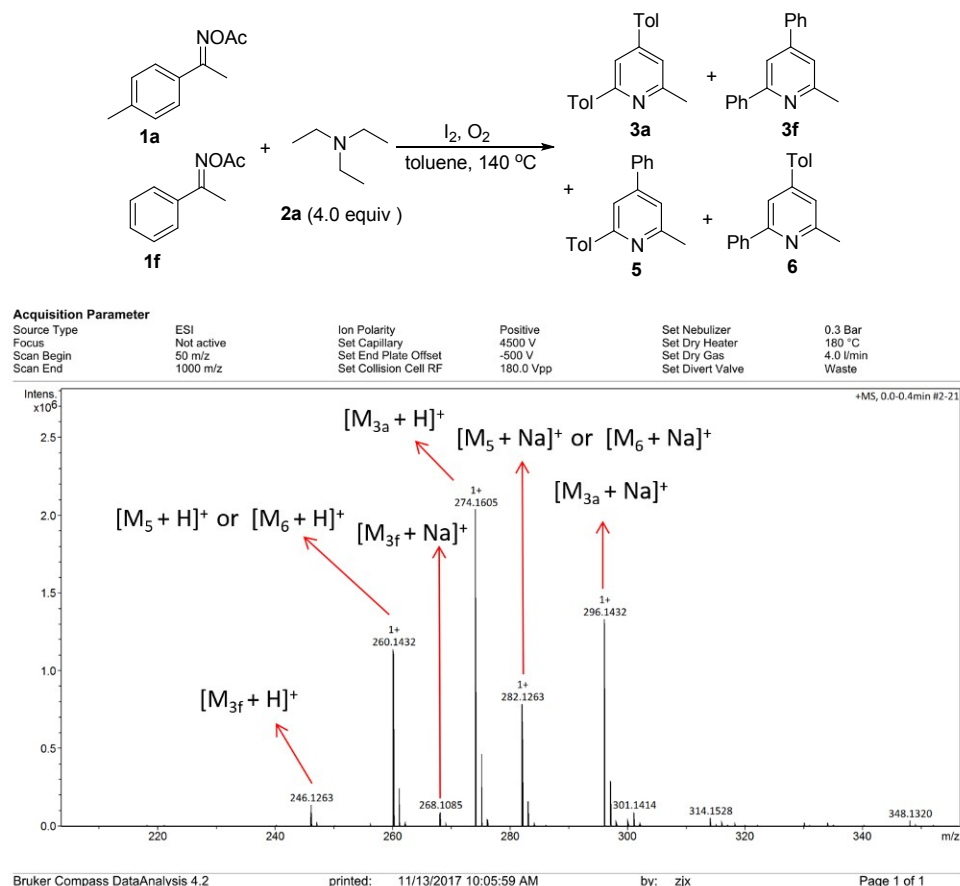

## 2. The <sup>13</sup>C-labeling and D-labeling experiments and the spectrogram

We further experimented to develop a better understanding of the reaction mechanism by performing <sup>13</sup>C-labeling and D-labeling experiments under the optimized conditions using acetophenone-β,β,β-d<sub>3</sub> oxime acetate and acetophenone-β-<sup>13</sup>C oxime acetate, respectively, as substrates. The corresponding desired products **3f'** and **3f-d<sub>2</sub>** were obtained in 82% and 79% yields, respectively (Scheme 4a and 4b). These experimental results strongly suggested that methyl ketone *O*-acetyloximes provided four carbons to form the pyridine ring. Then, the speculation that the α-C of TEA was integrated into the final pyridines has been demonstrated when TEA-d<sub>15</sub> was used in this reaction system (Scheme 4c). Both of this deuterated experimental evidences are in agreement with the observation of internal D/H exchange in the 2-methylpyridines.

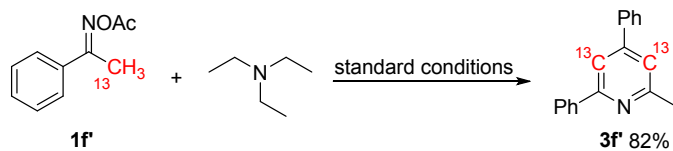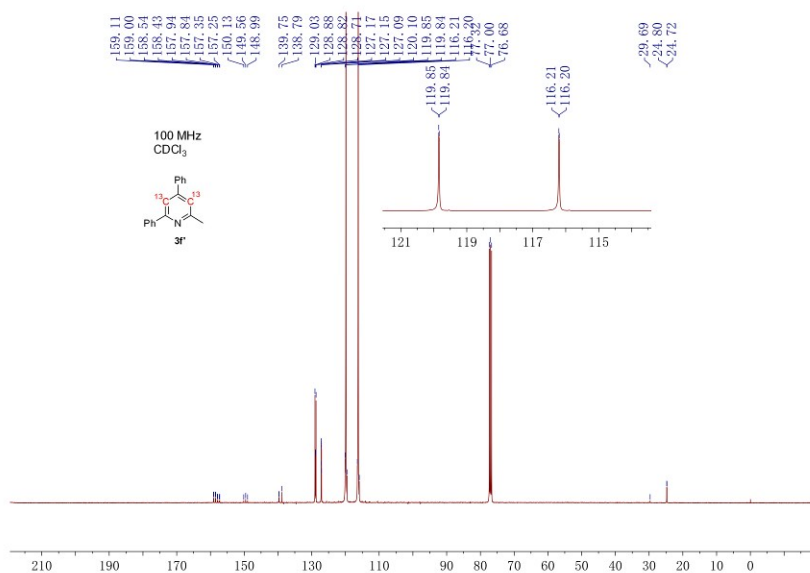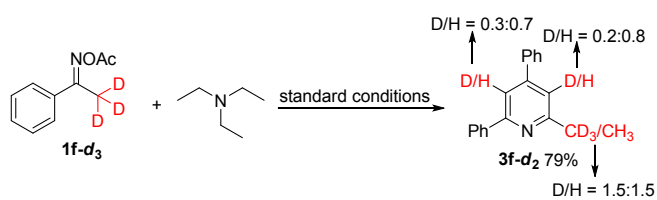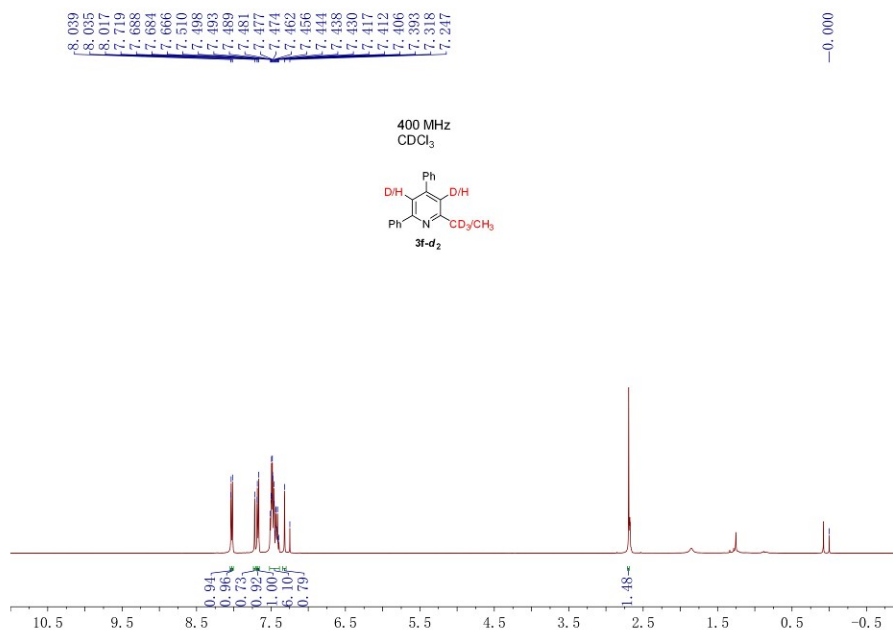

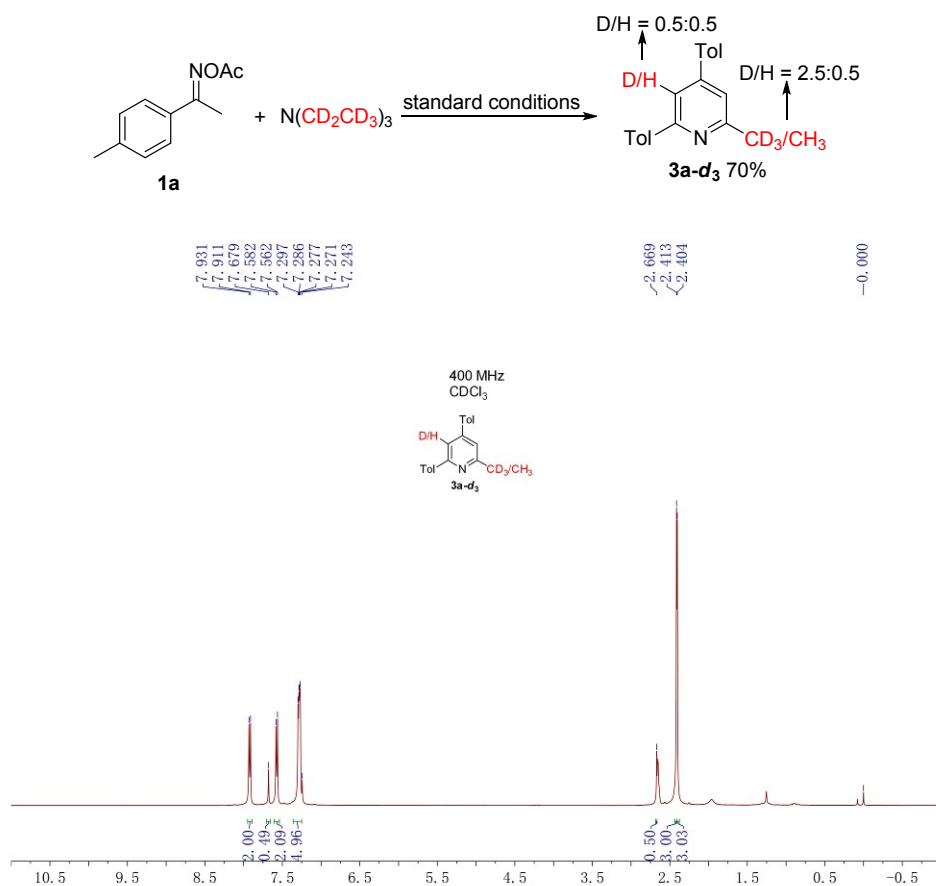

### 3. The HSQC and HMBC of 3d

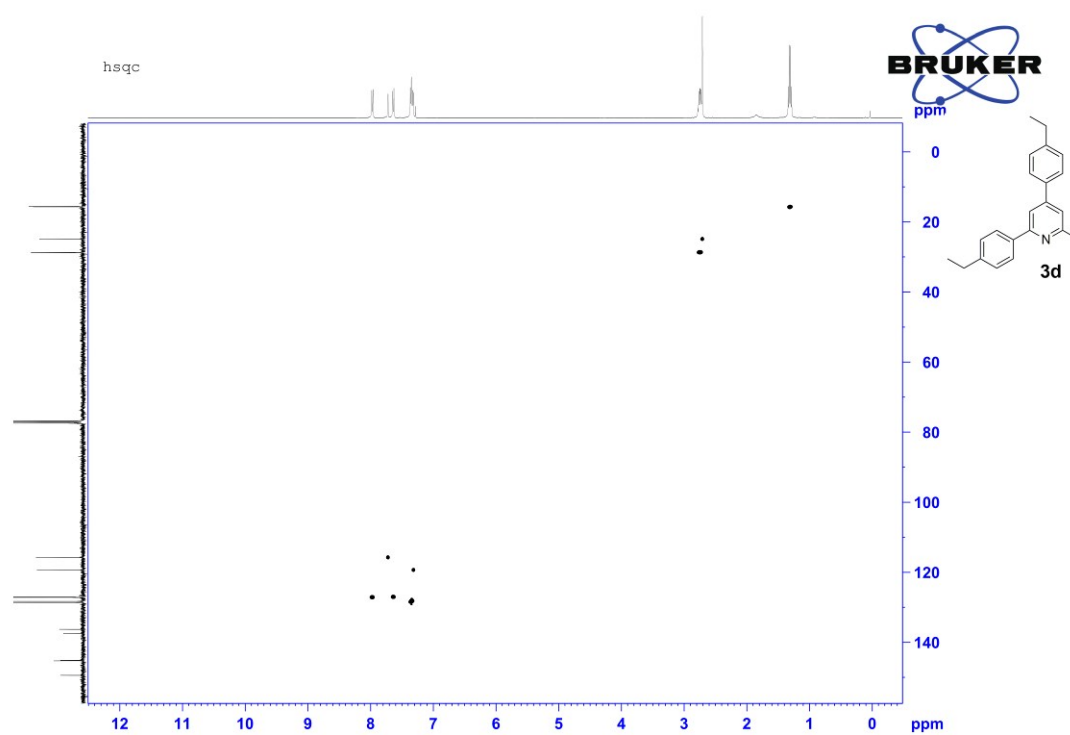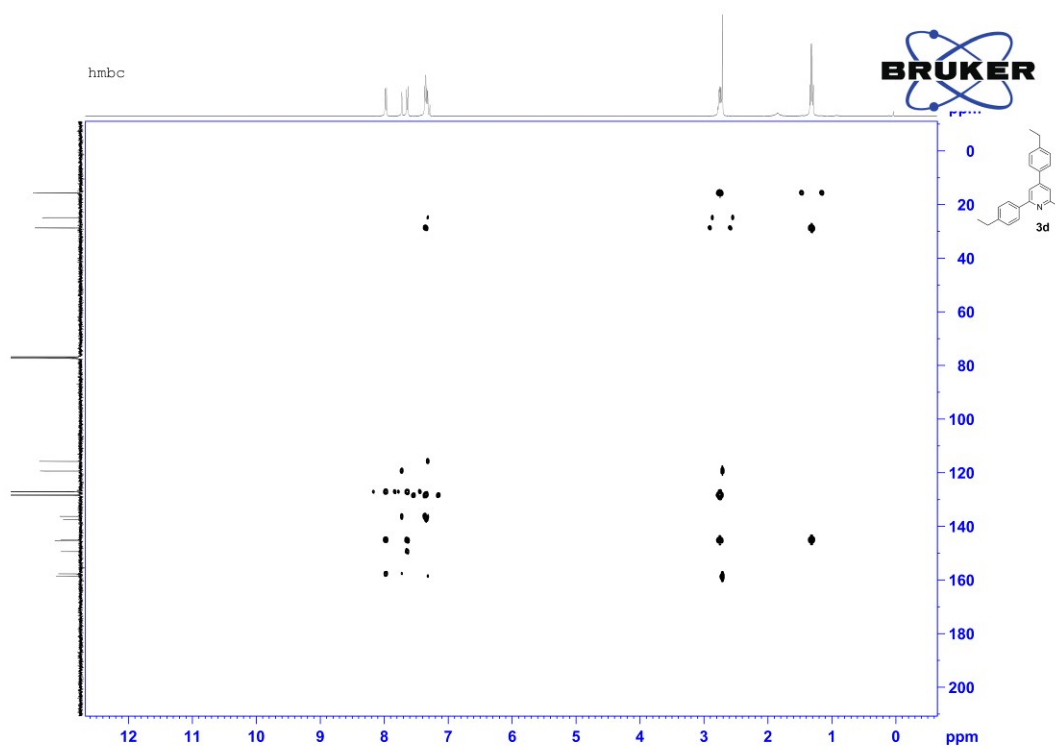

#### 4. $^1\text{H}$ and $^{13}\text{C}$ NMR spectra of compounds 3

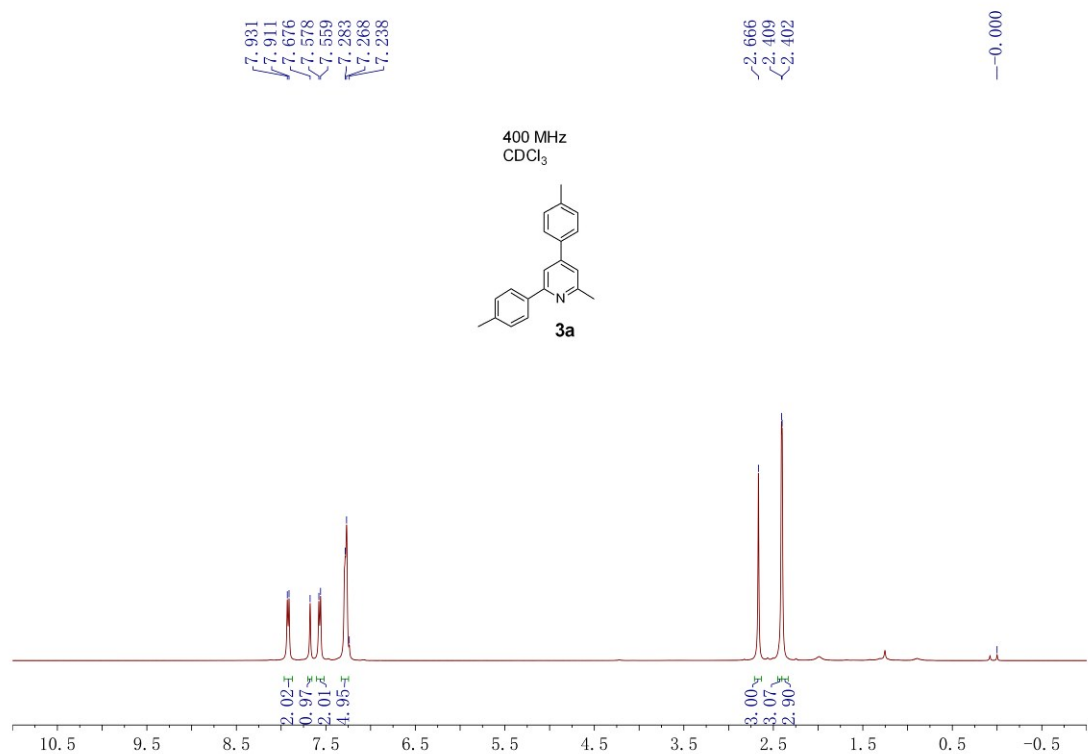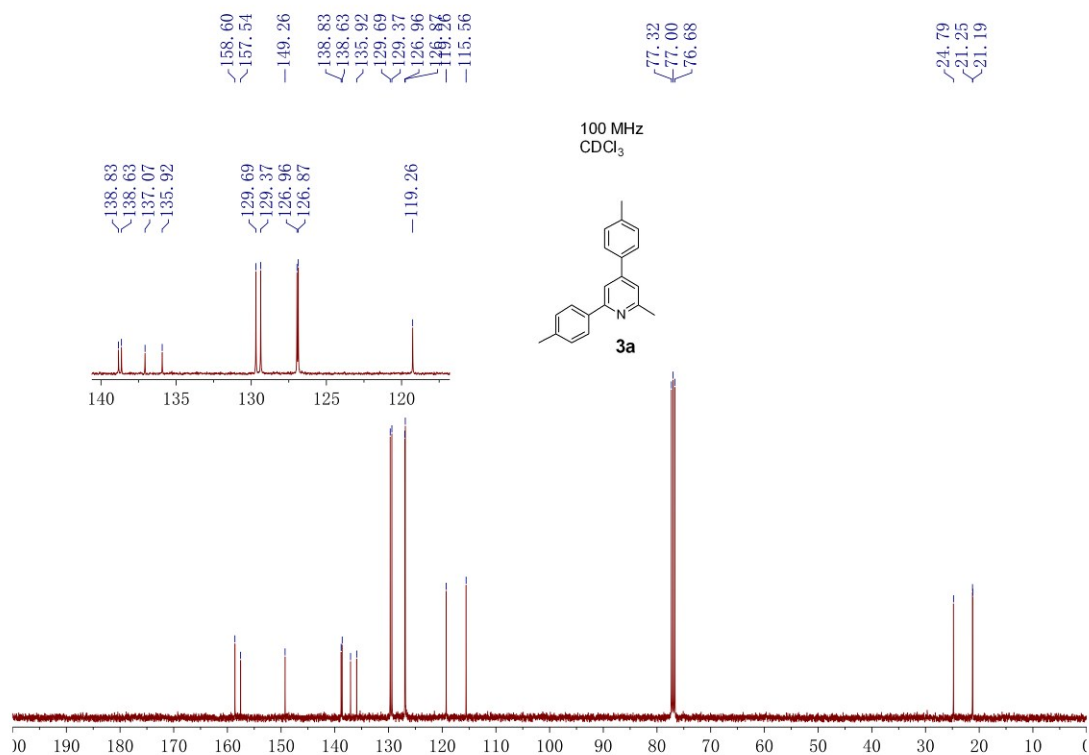

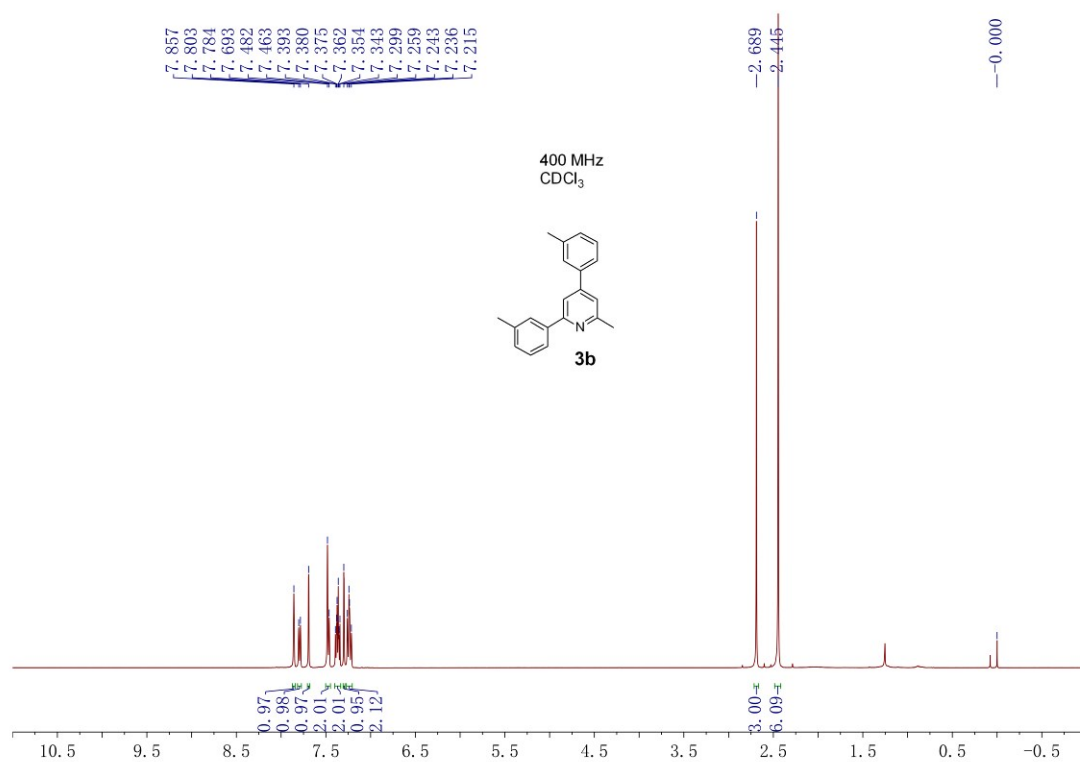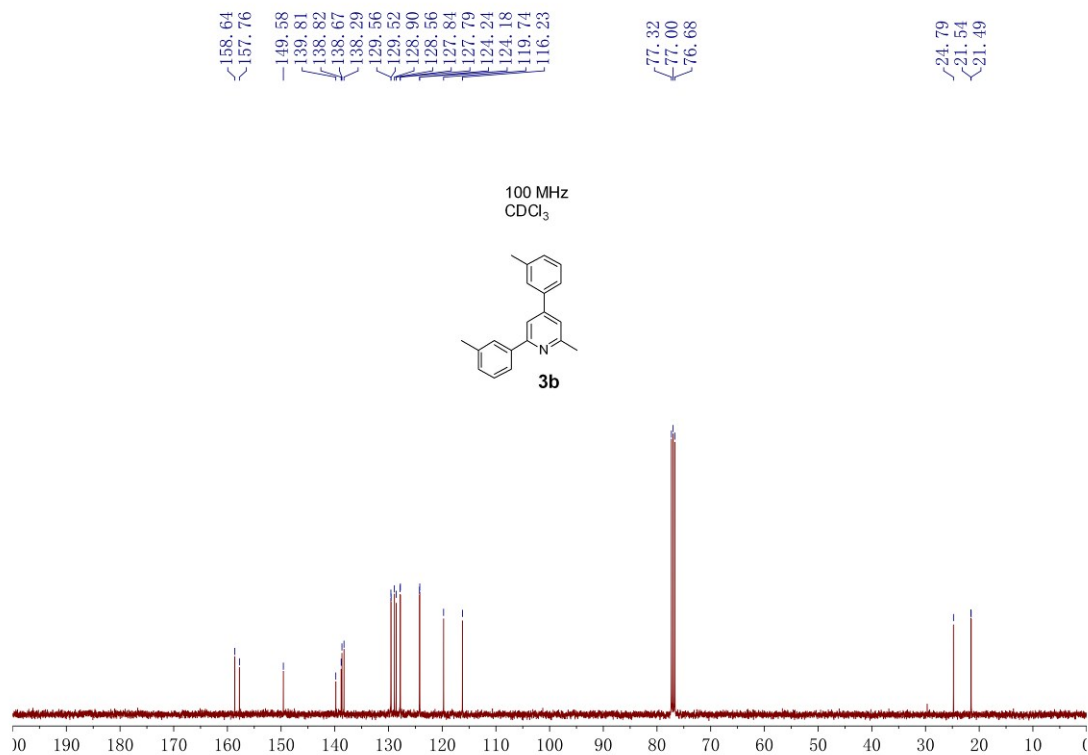

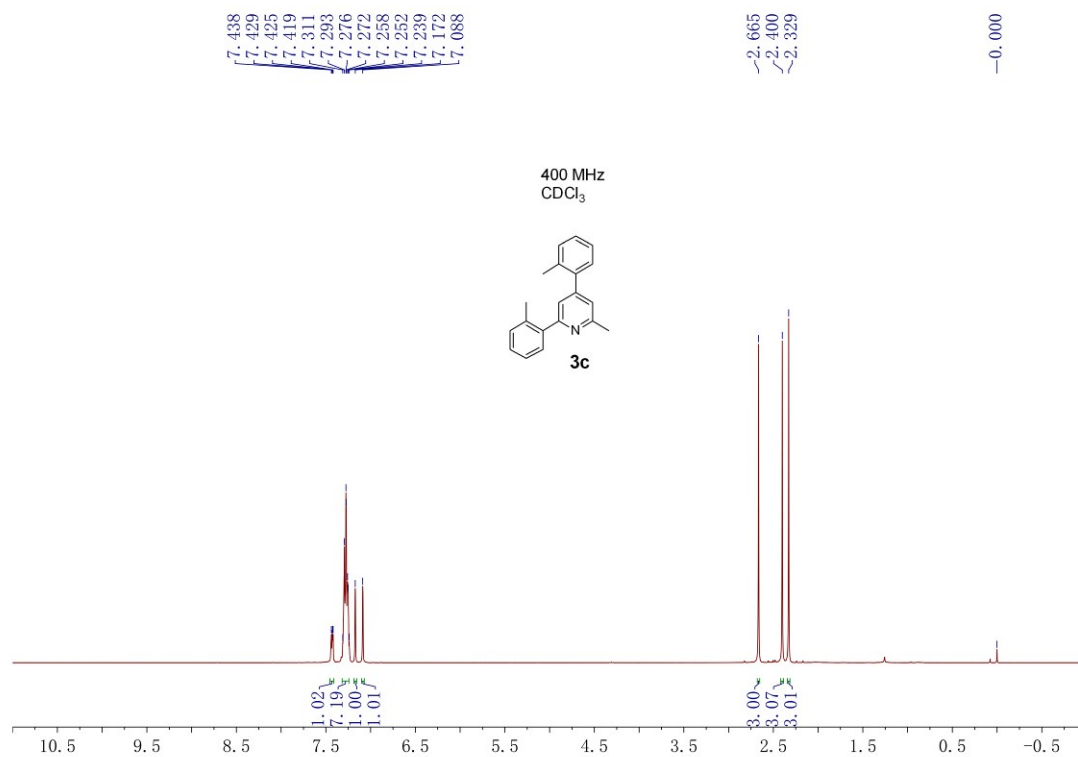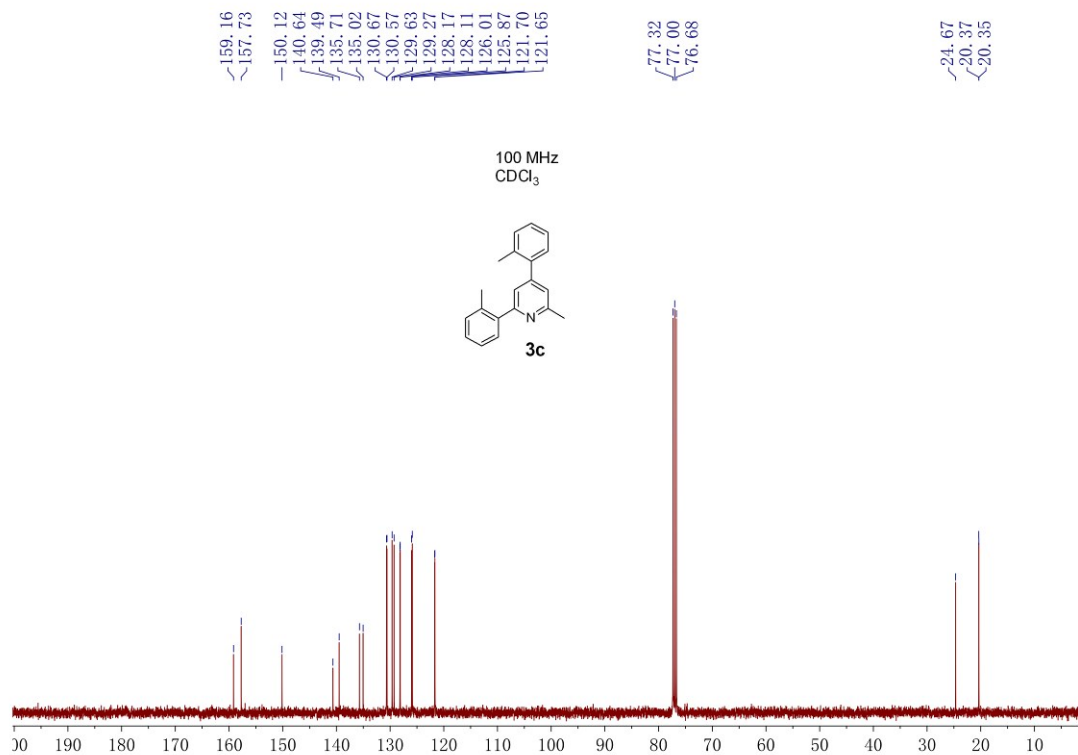

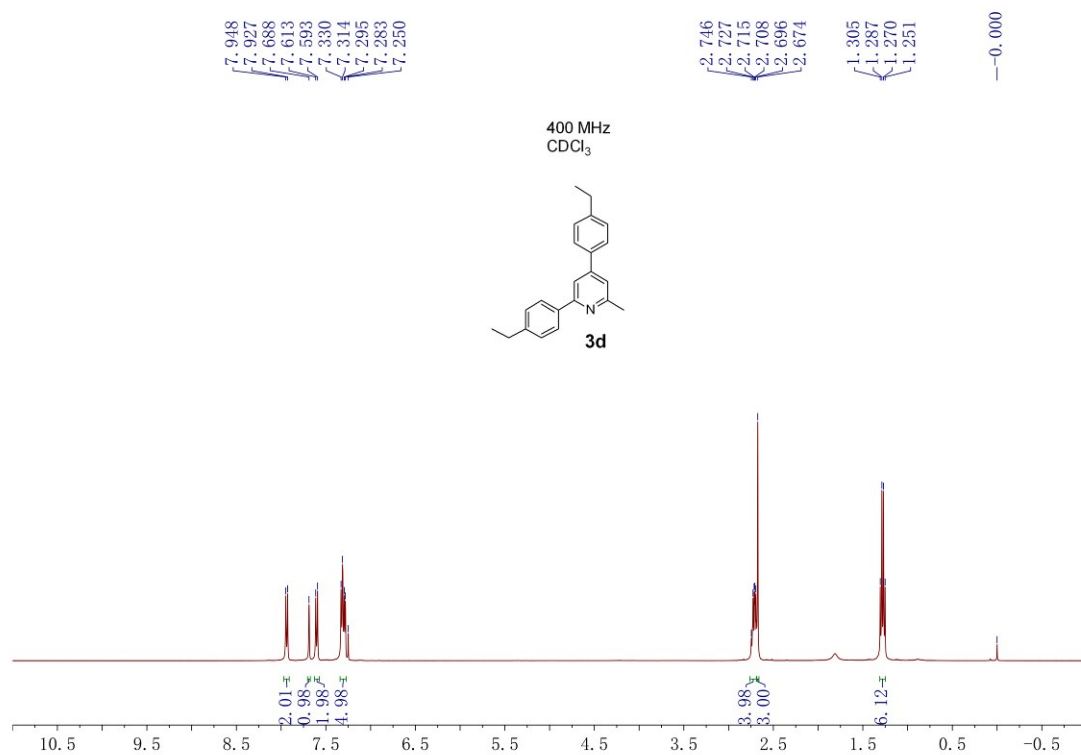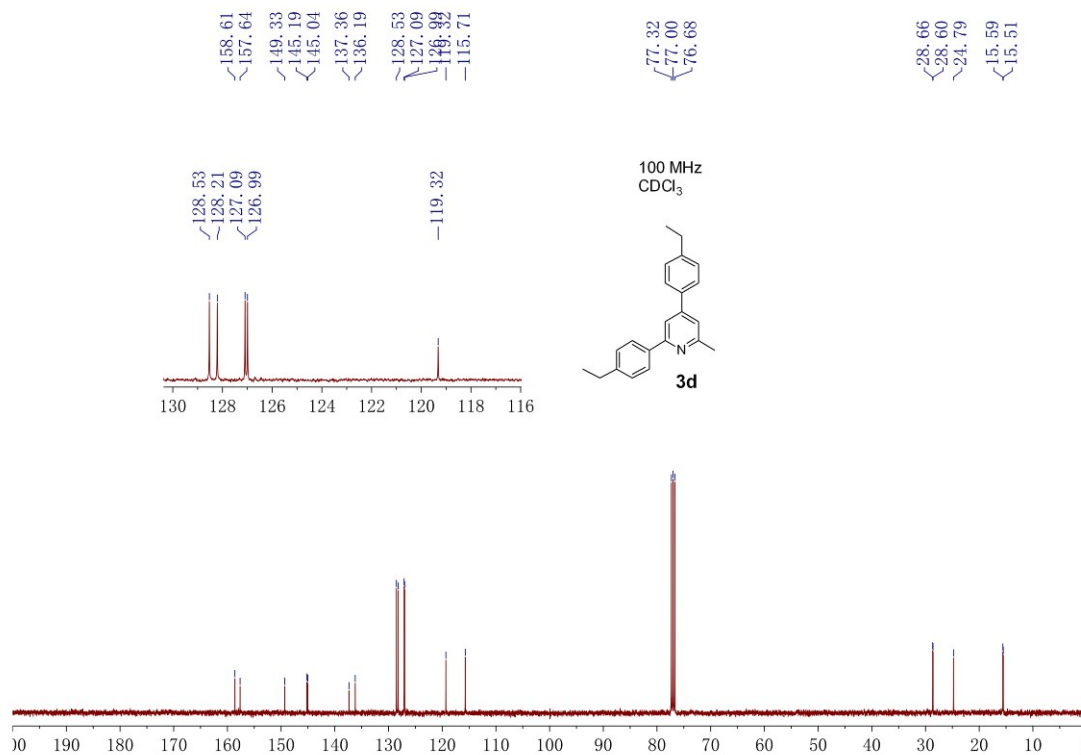

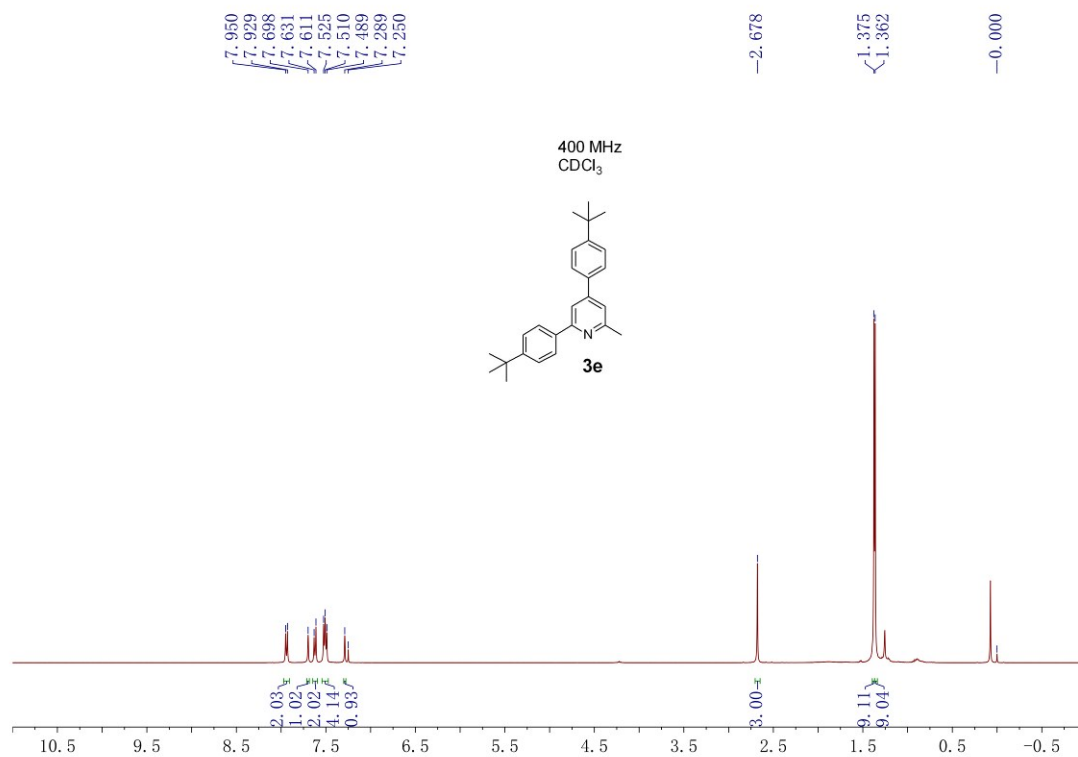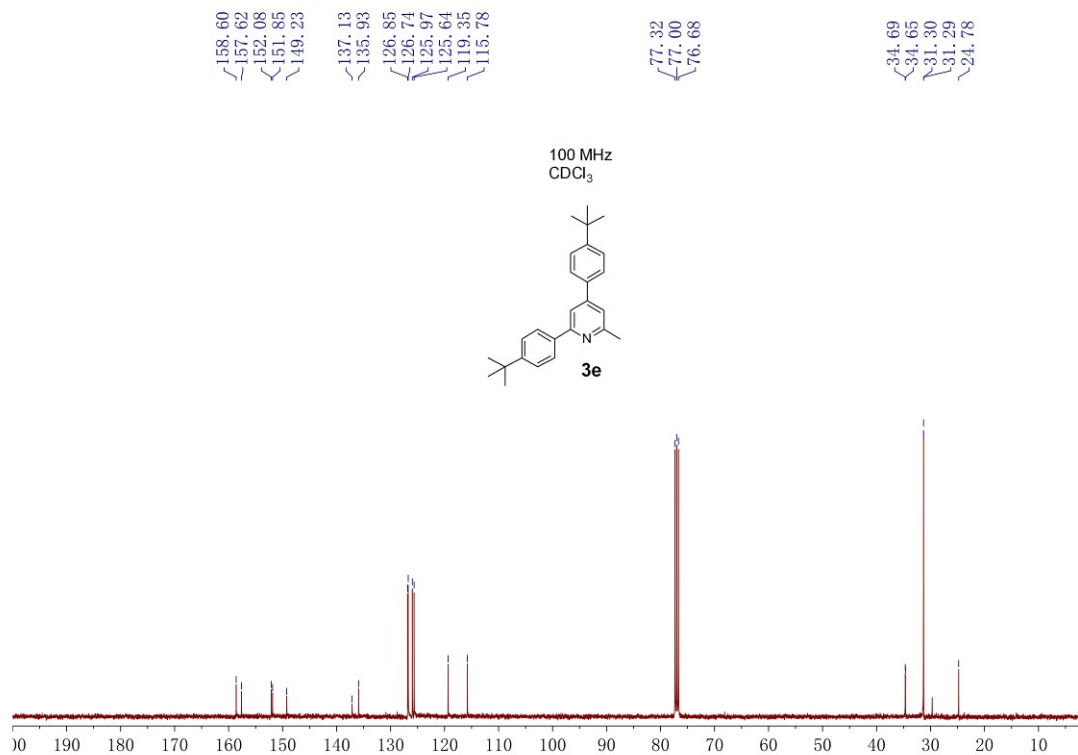

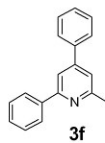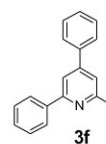

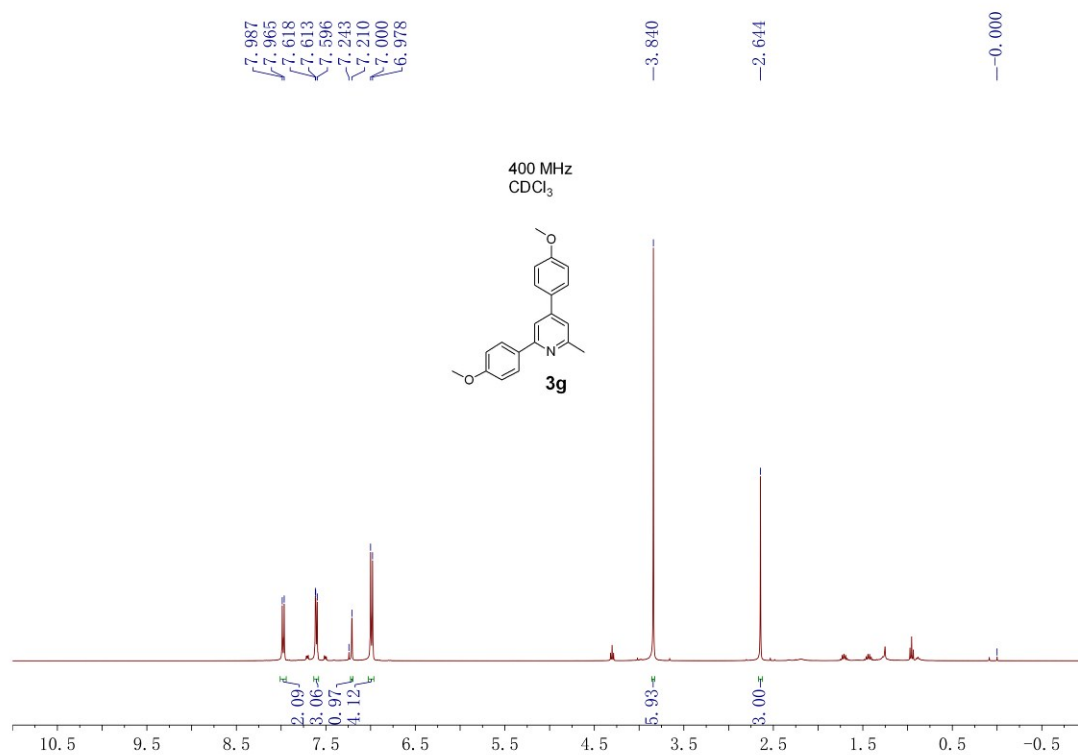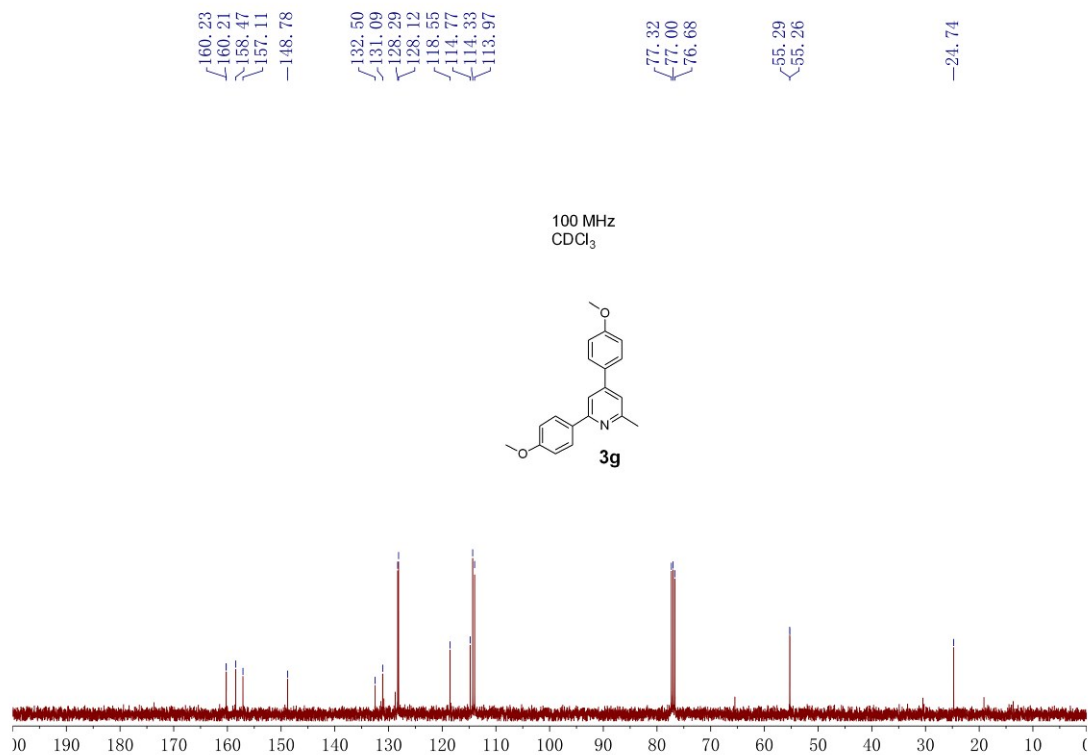

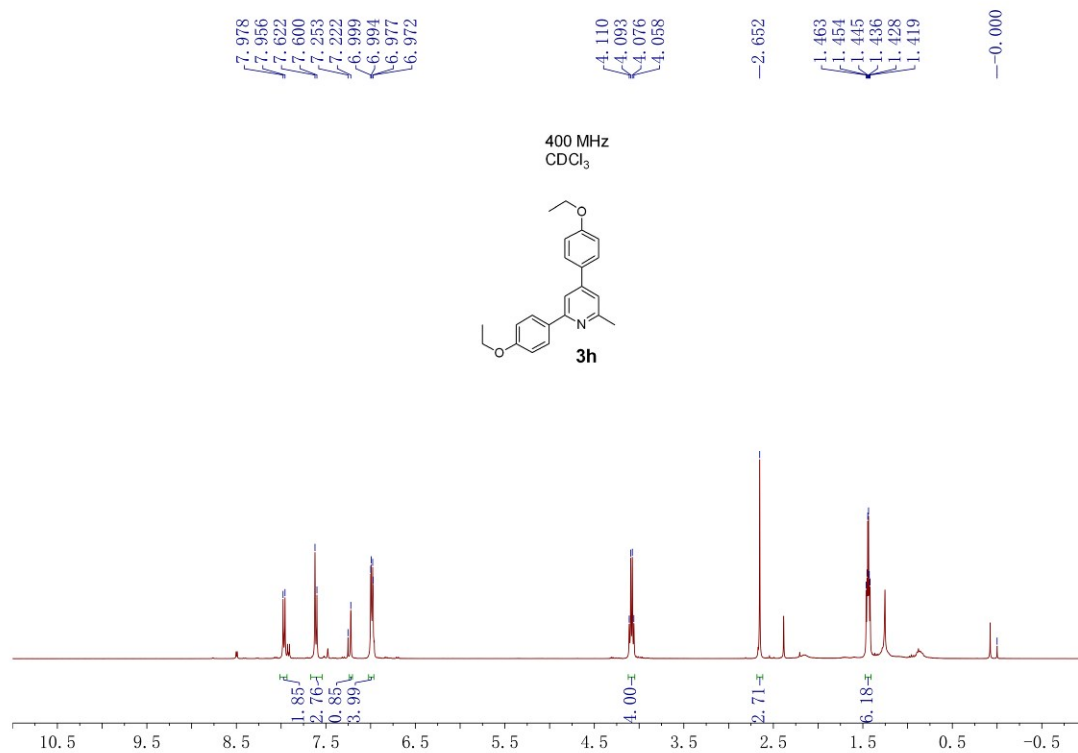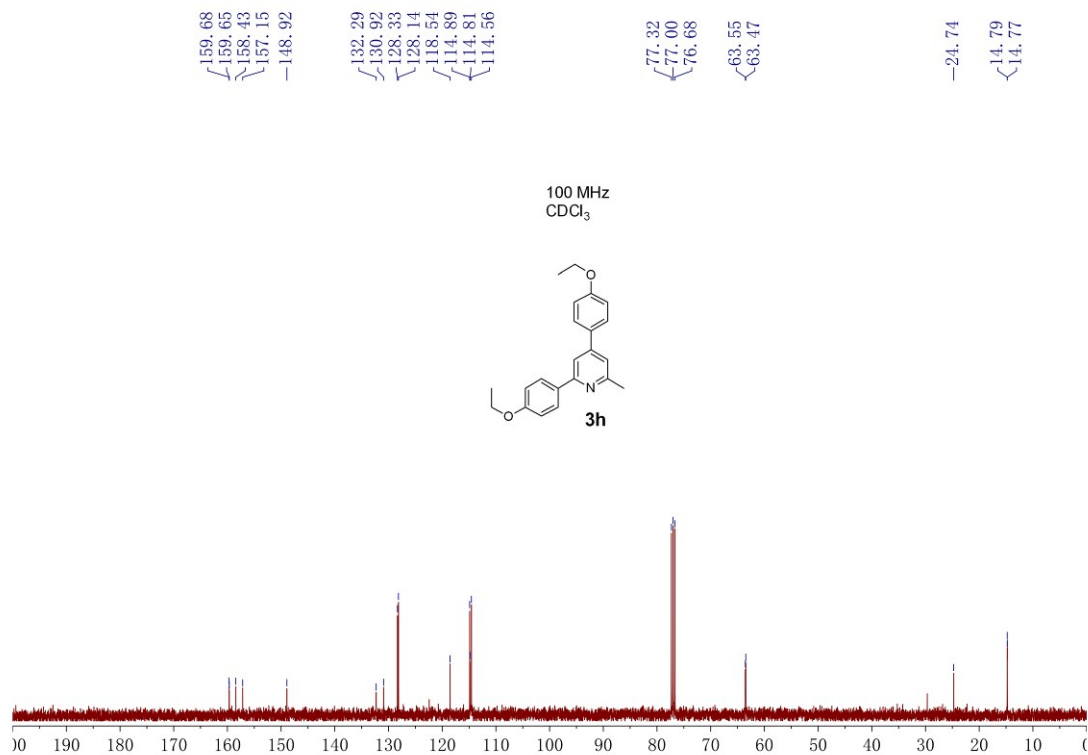

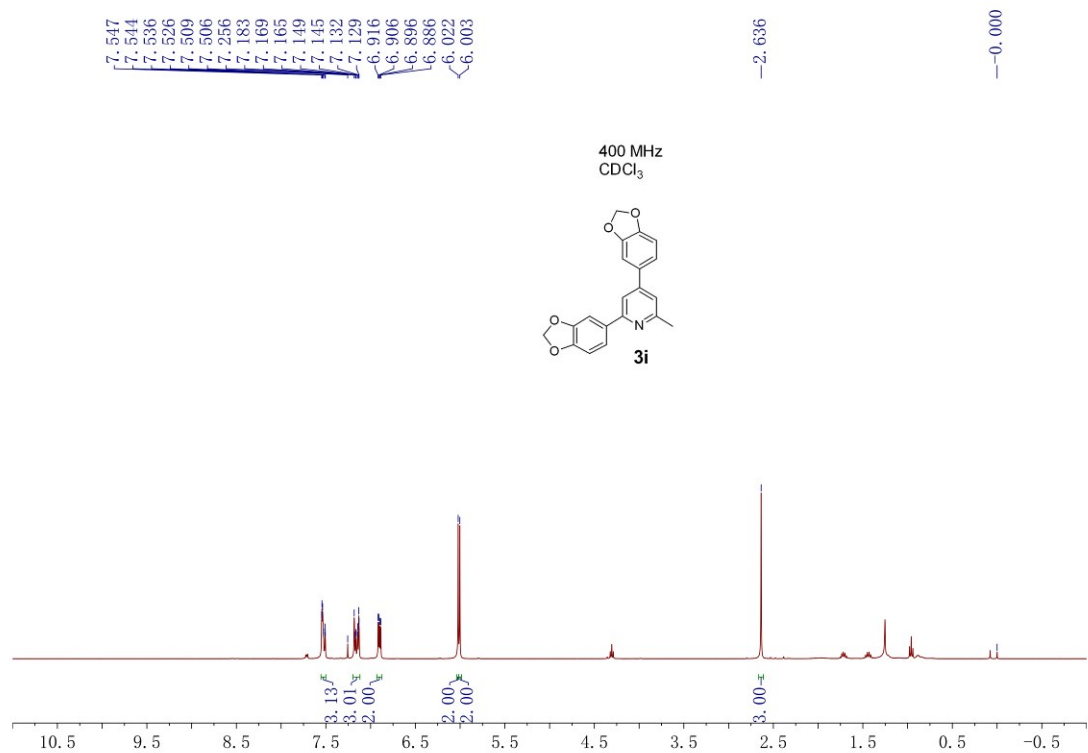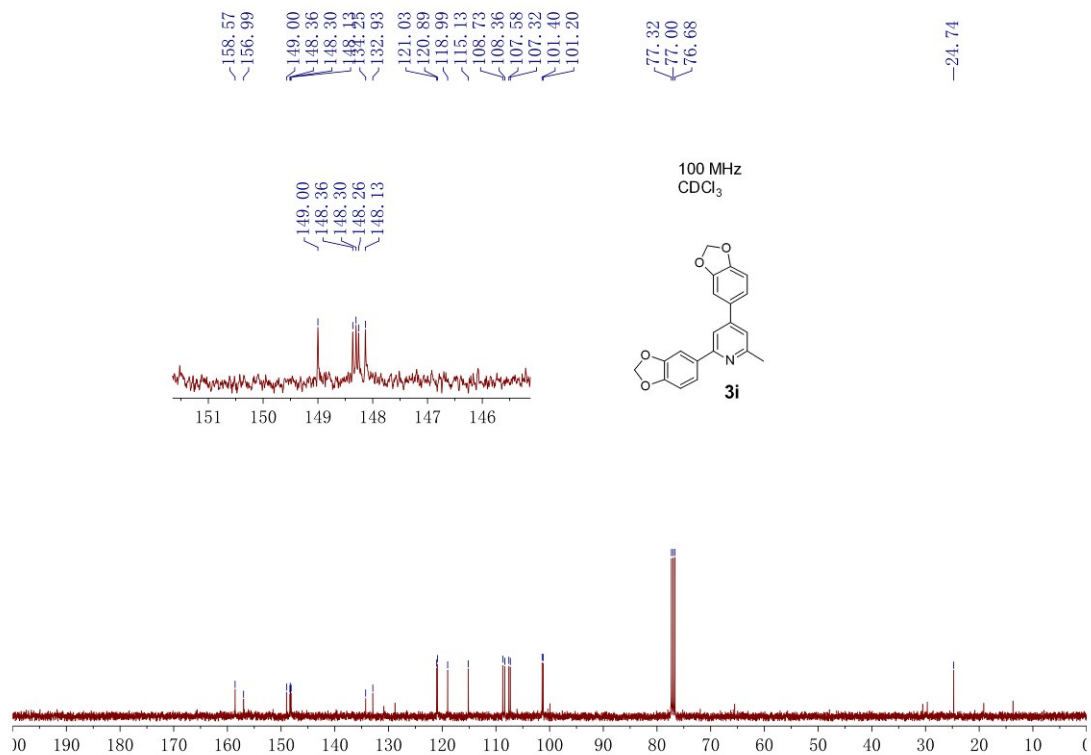

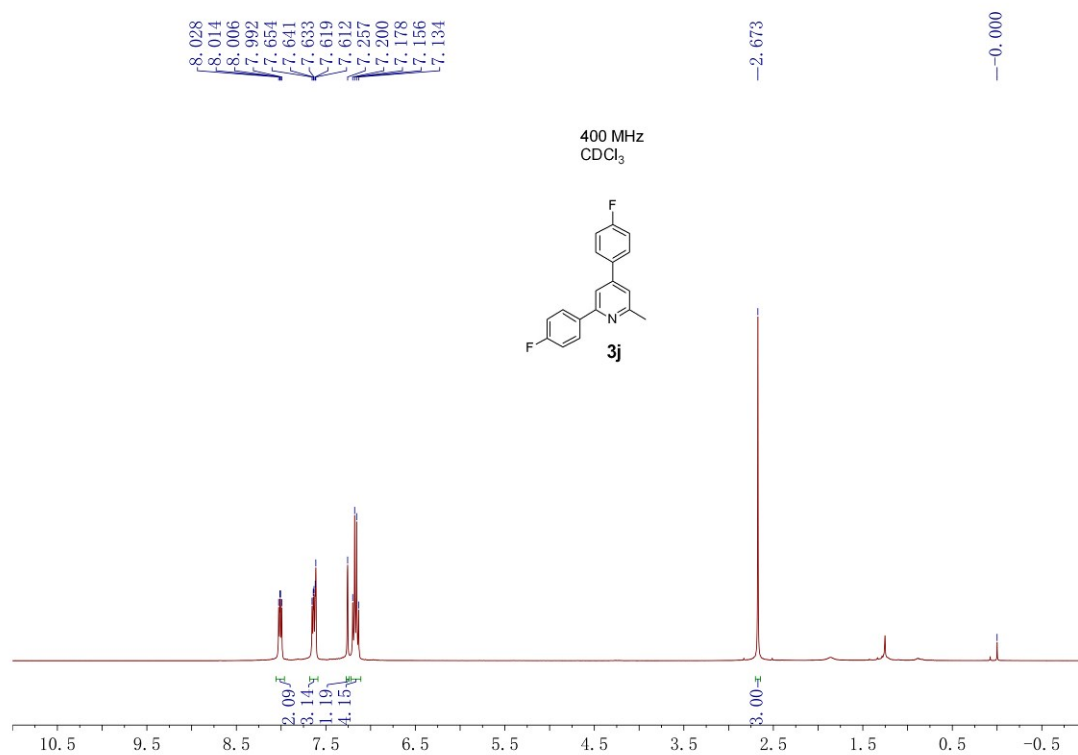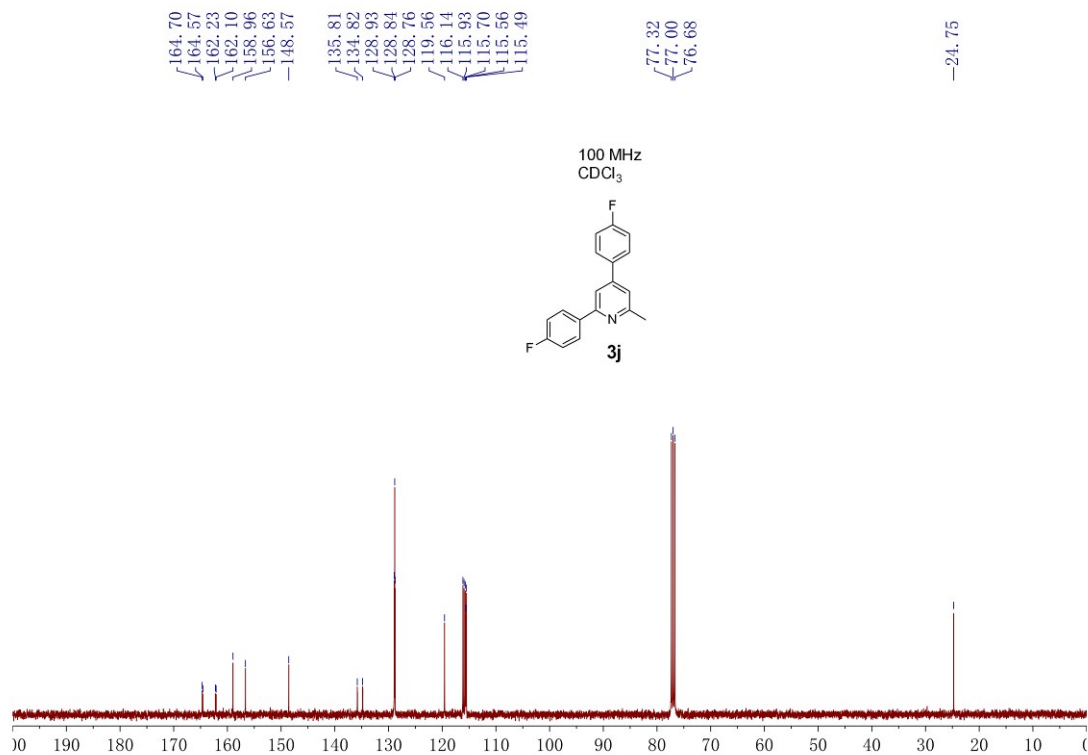

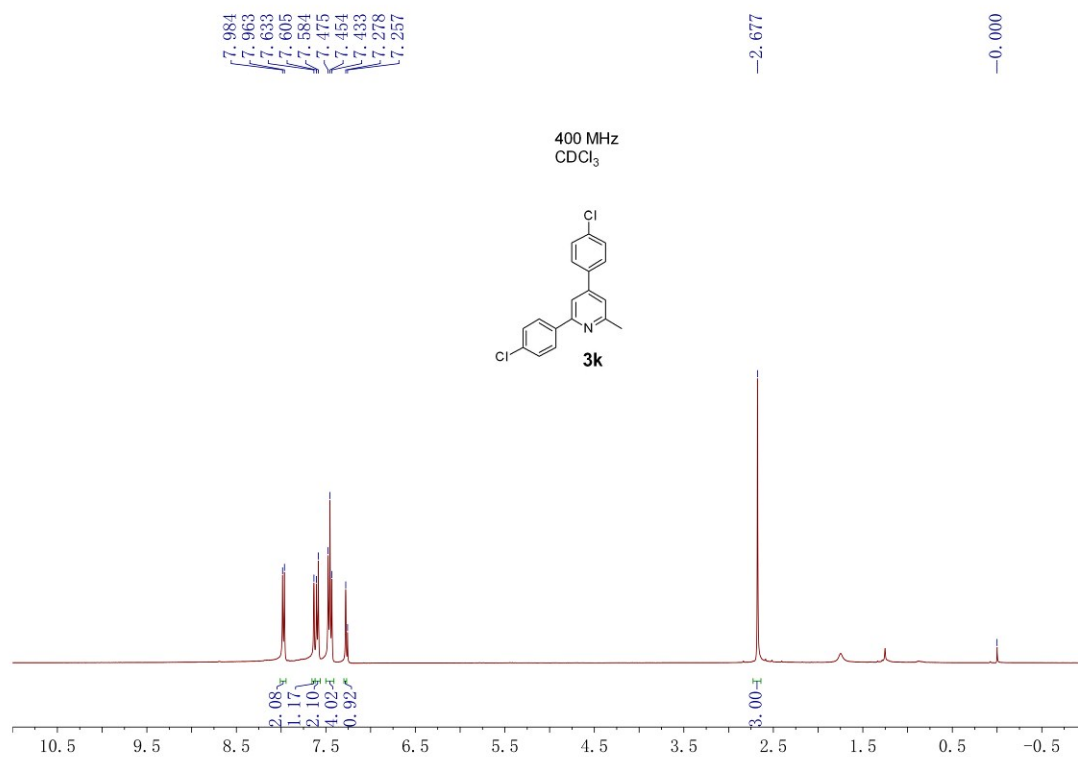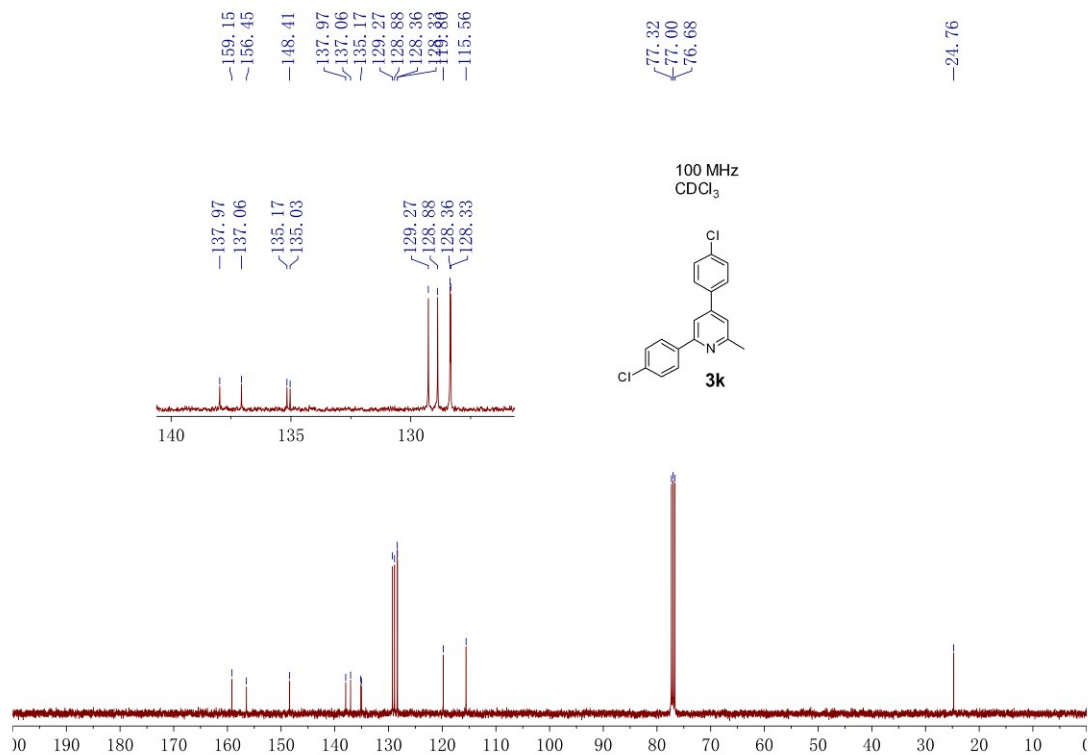

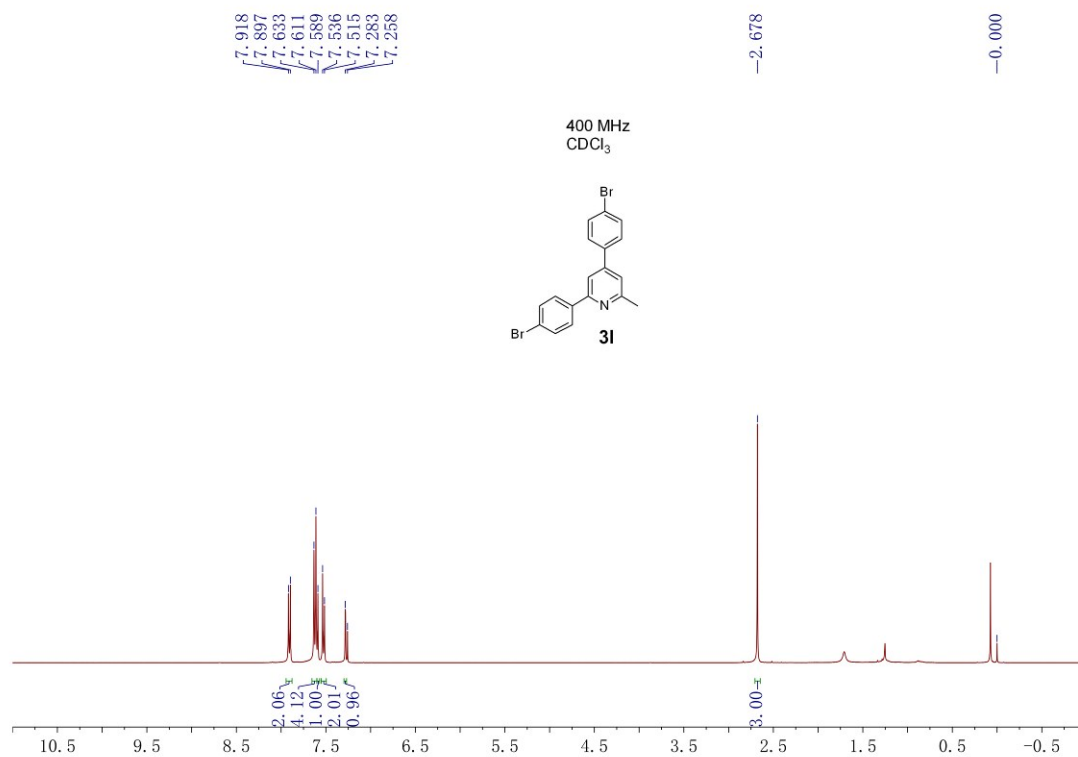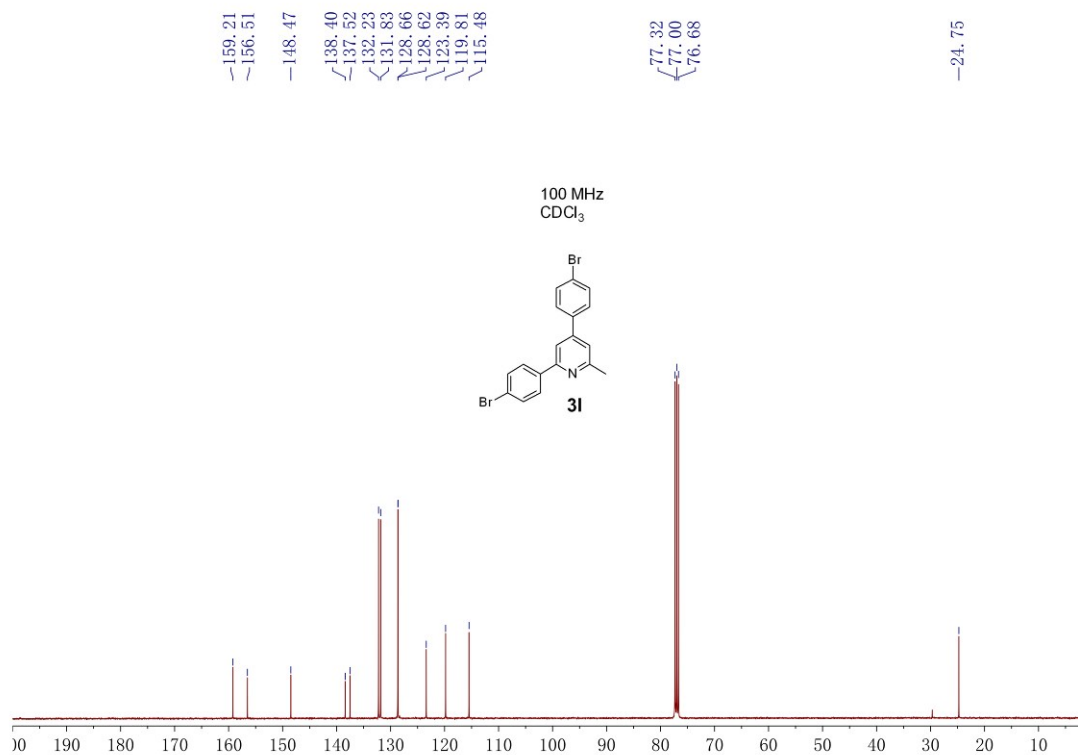

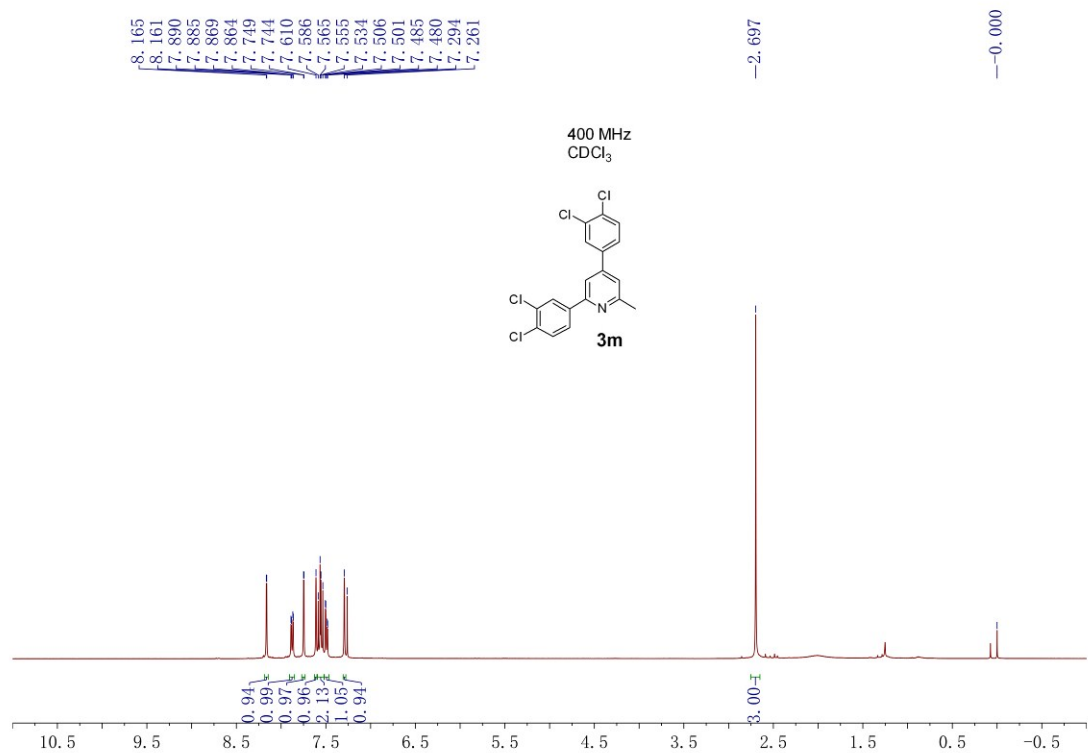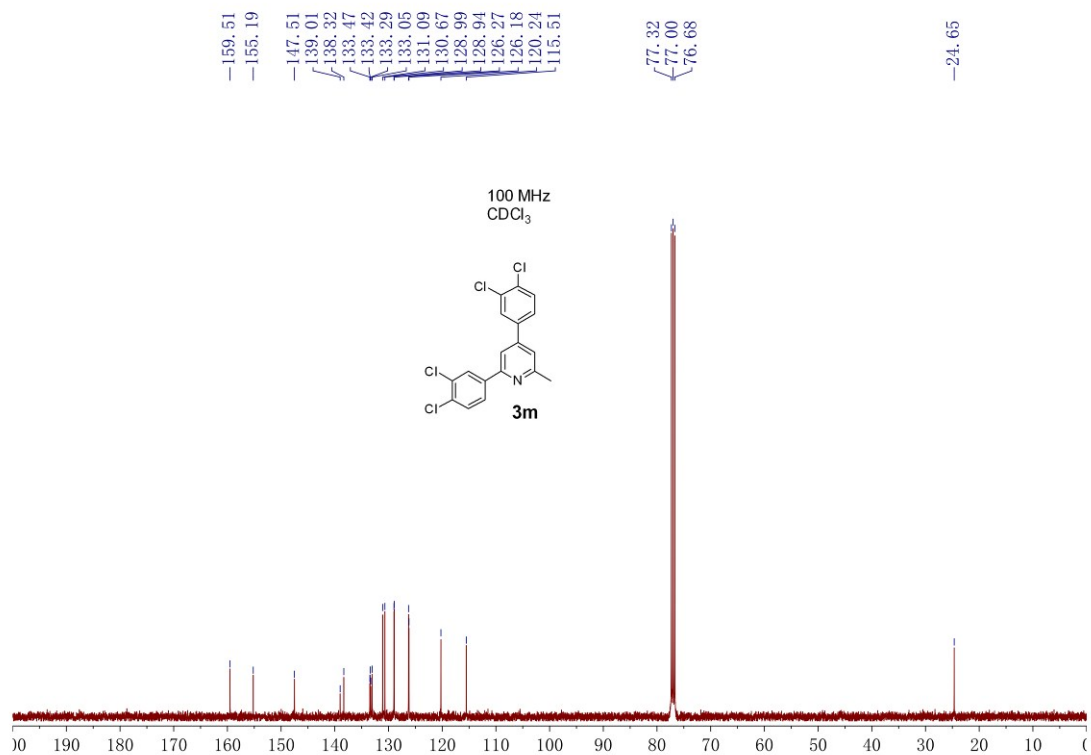

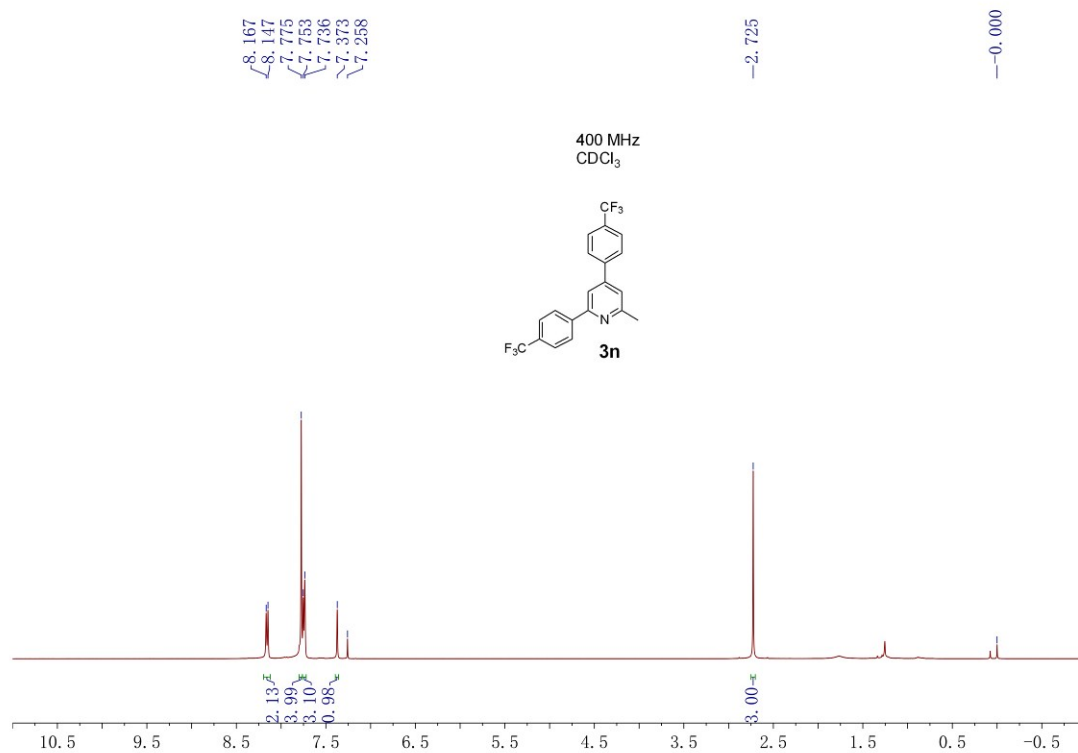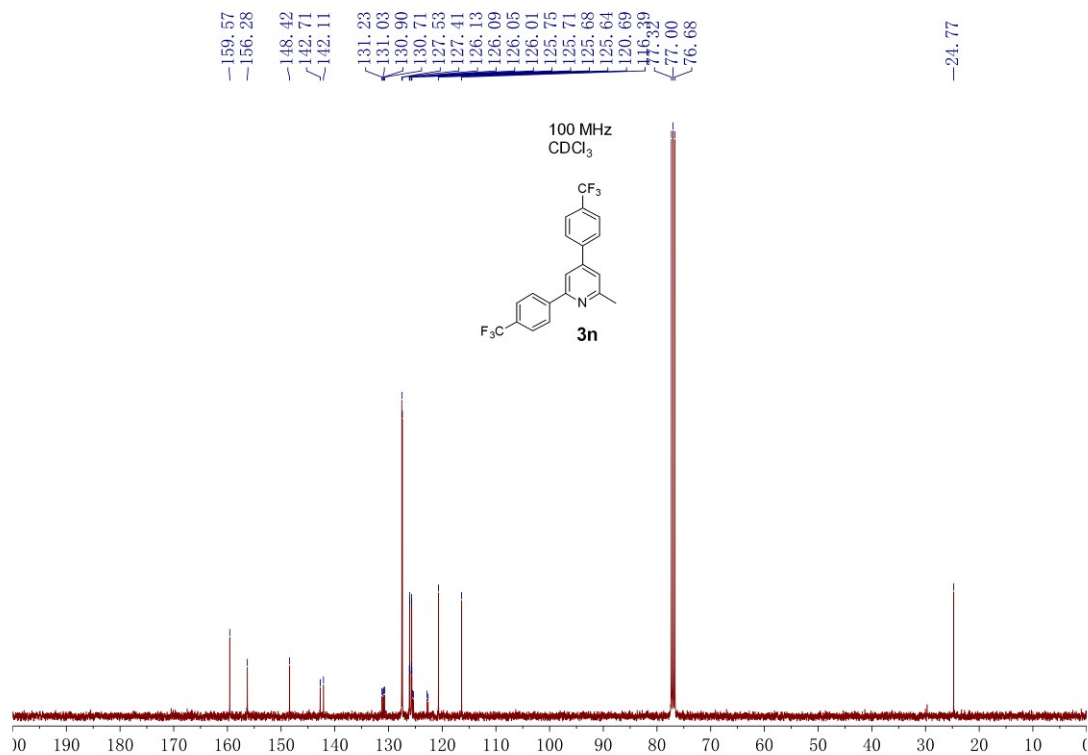

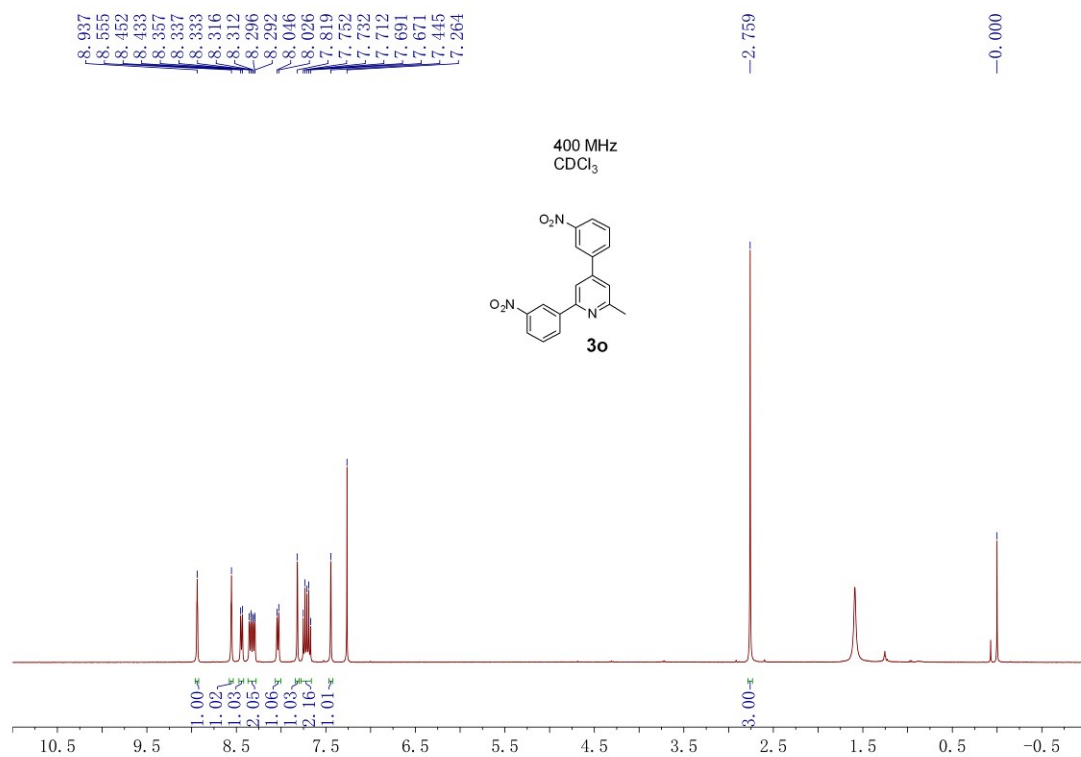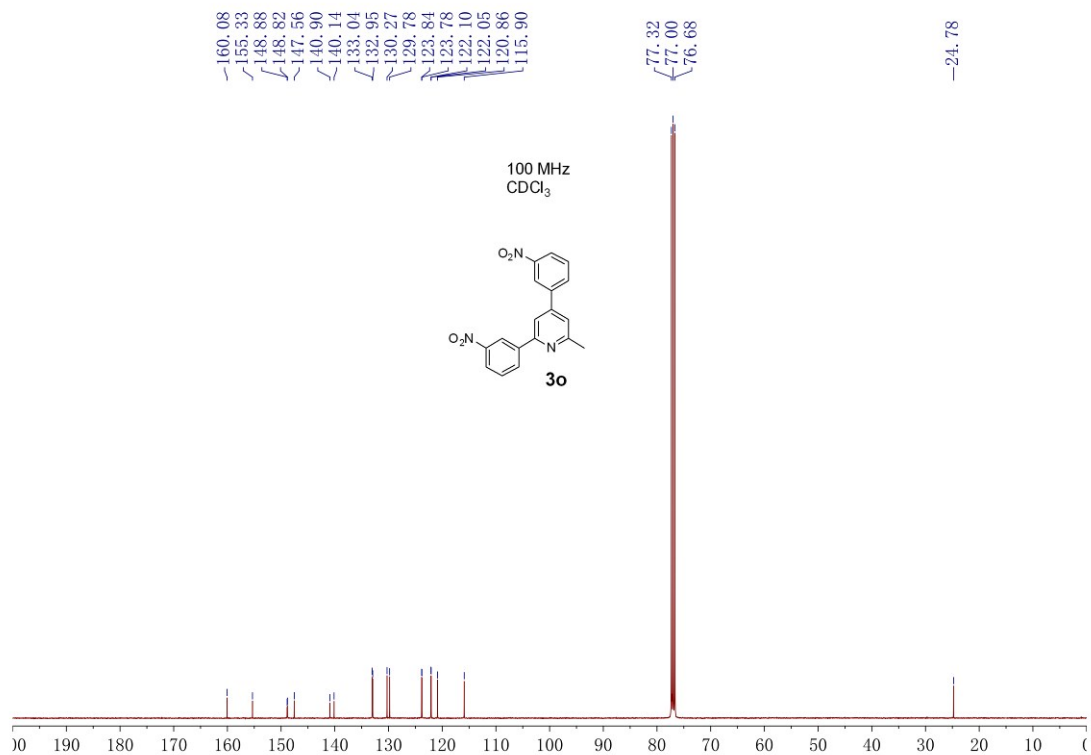

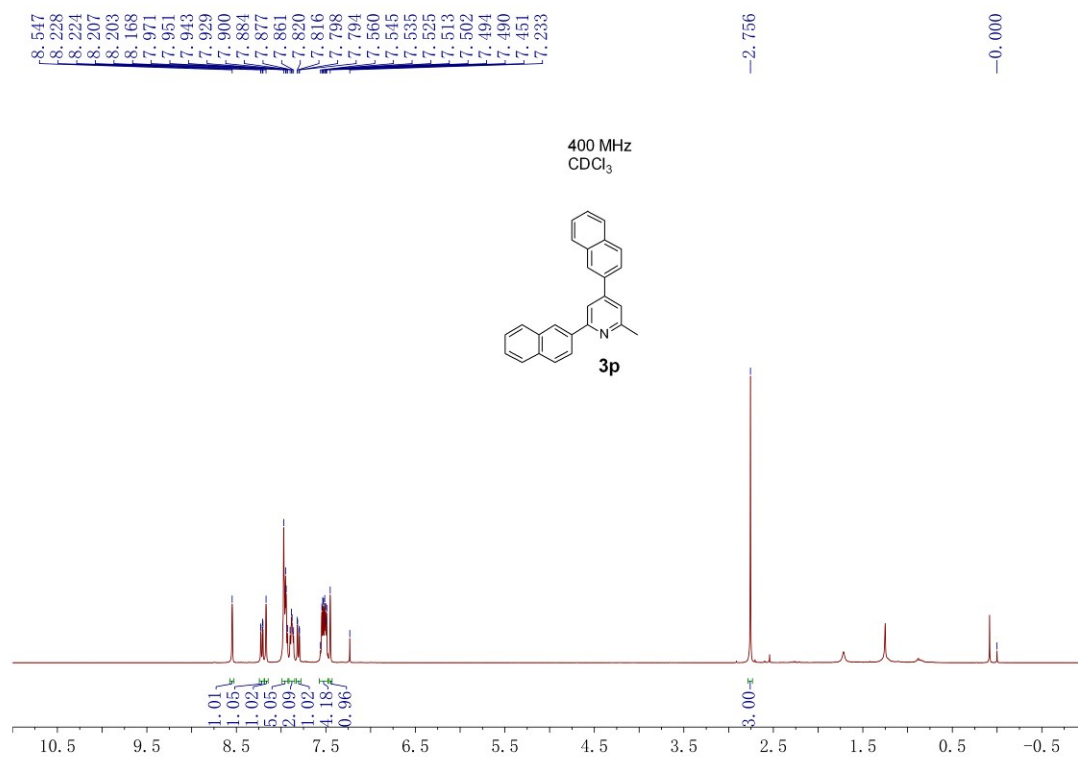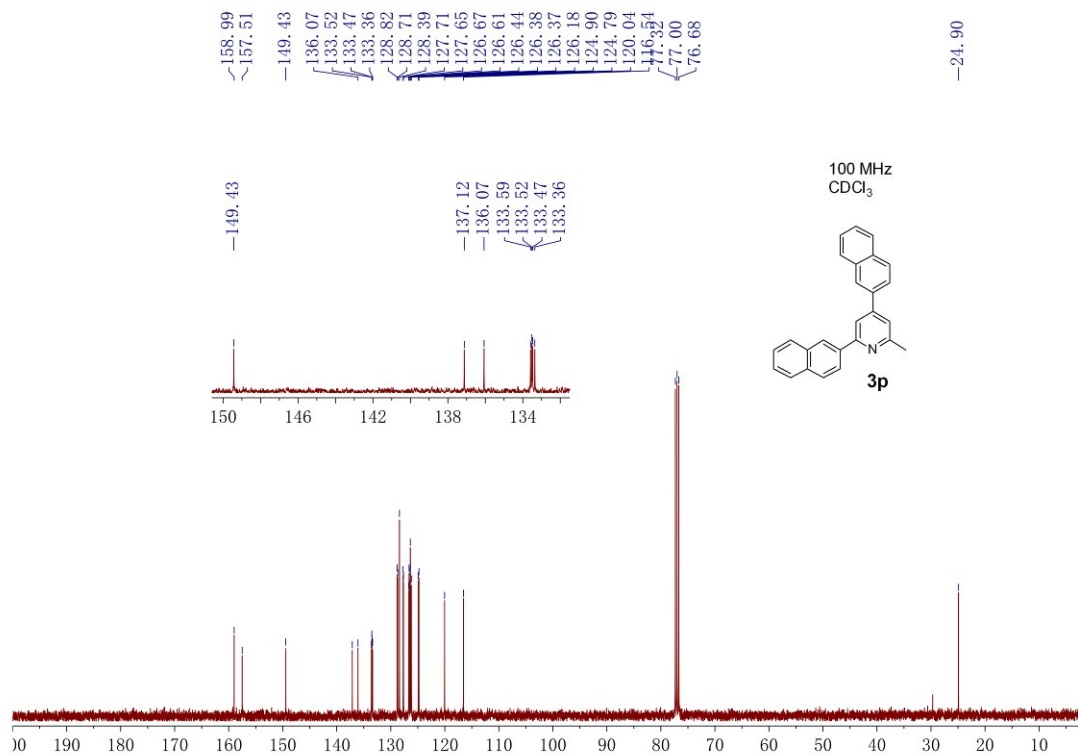

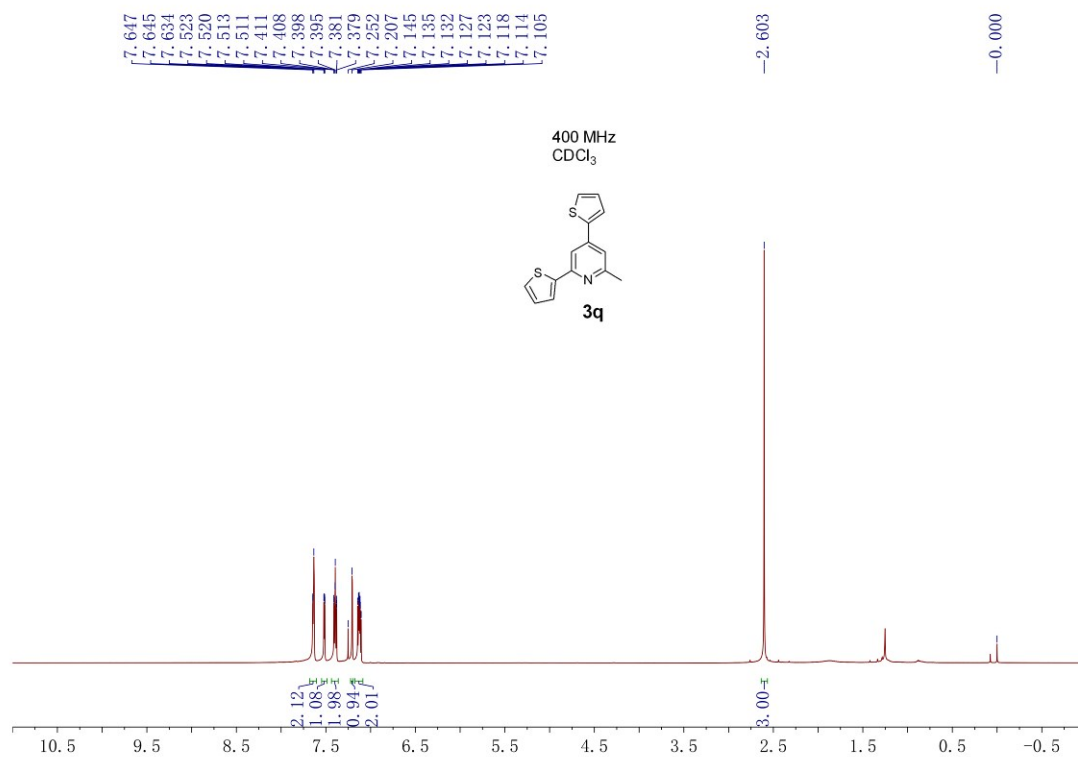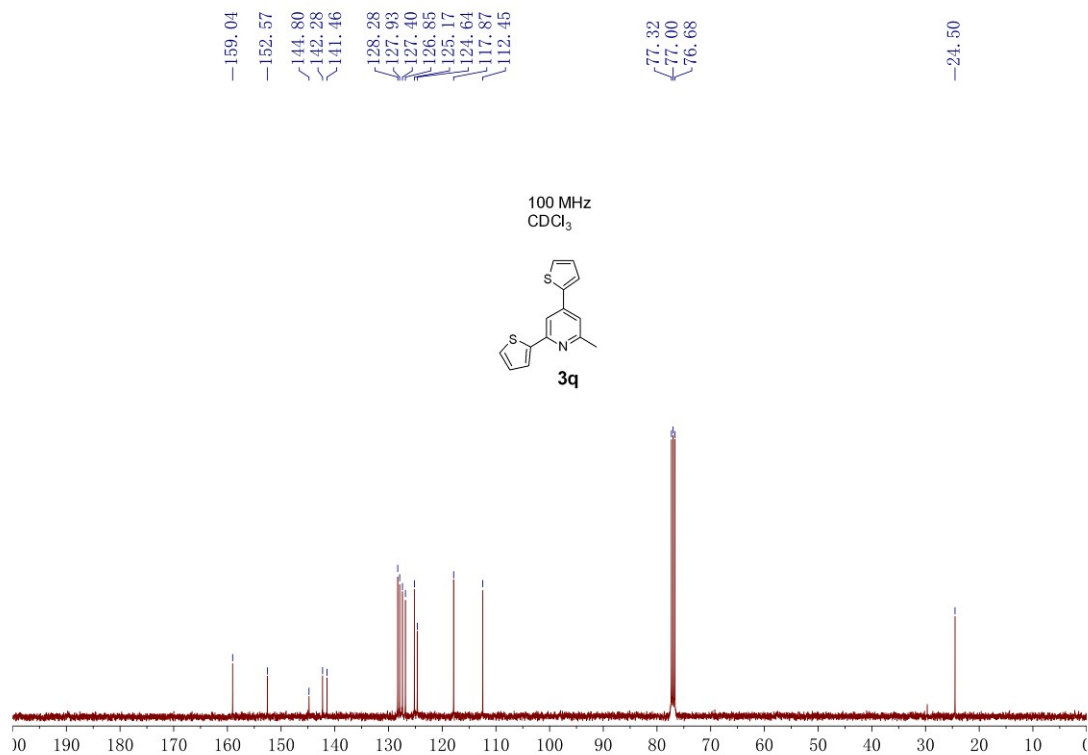

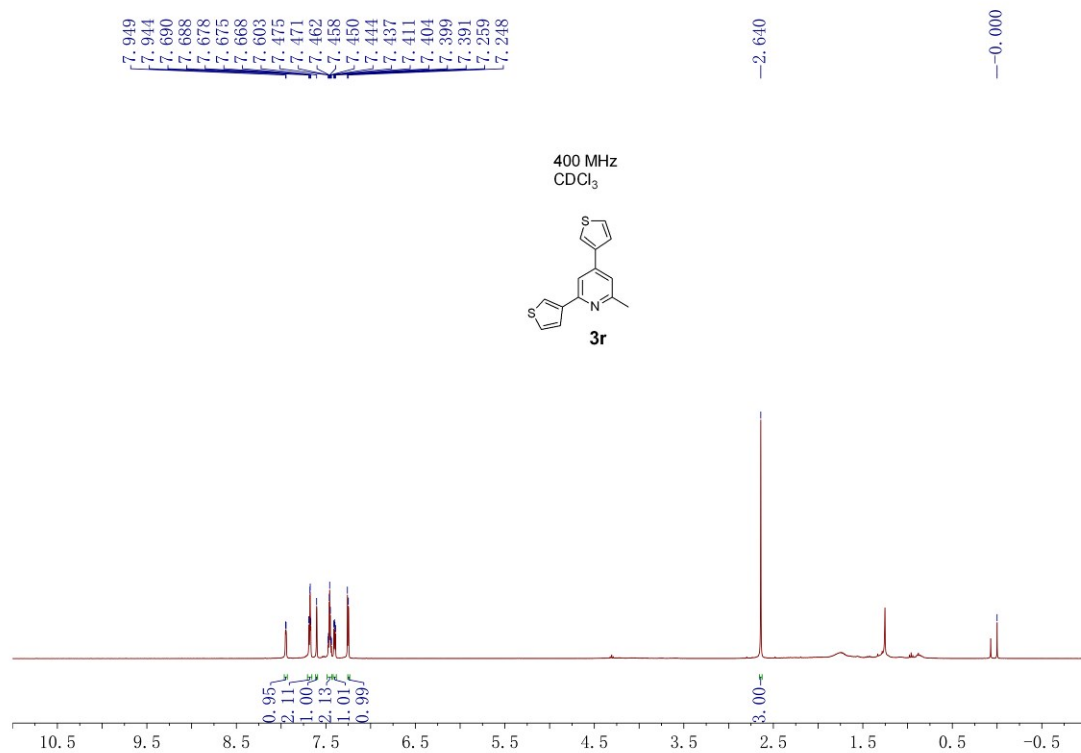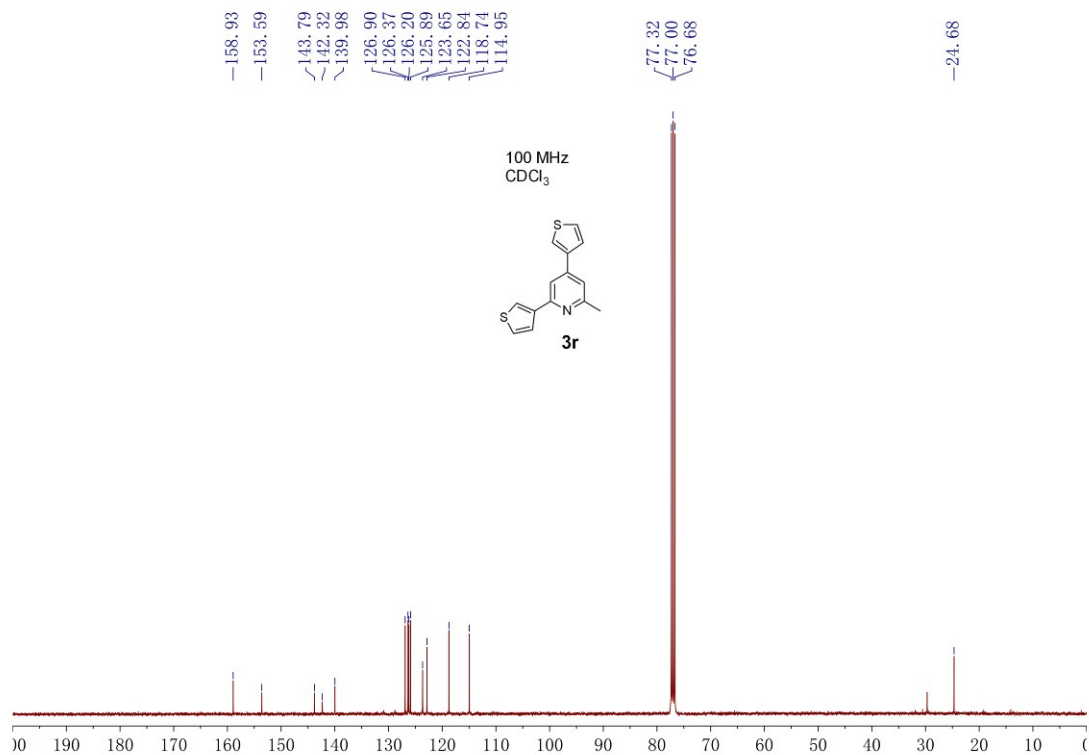

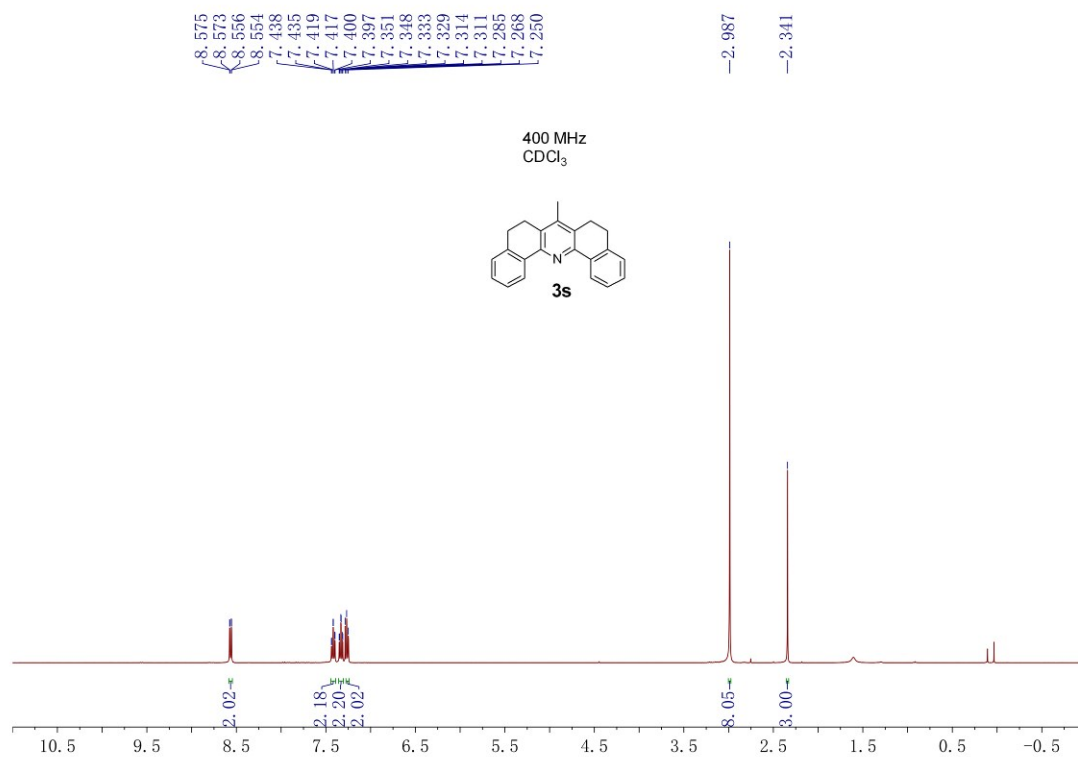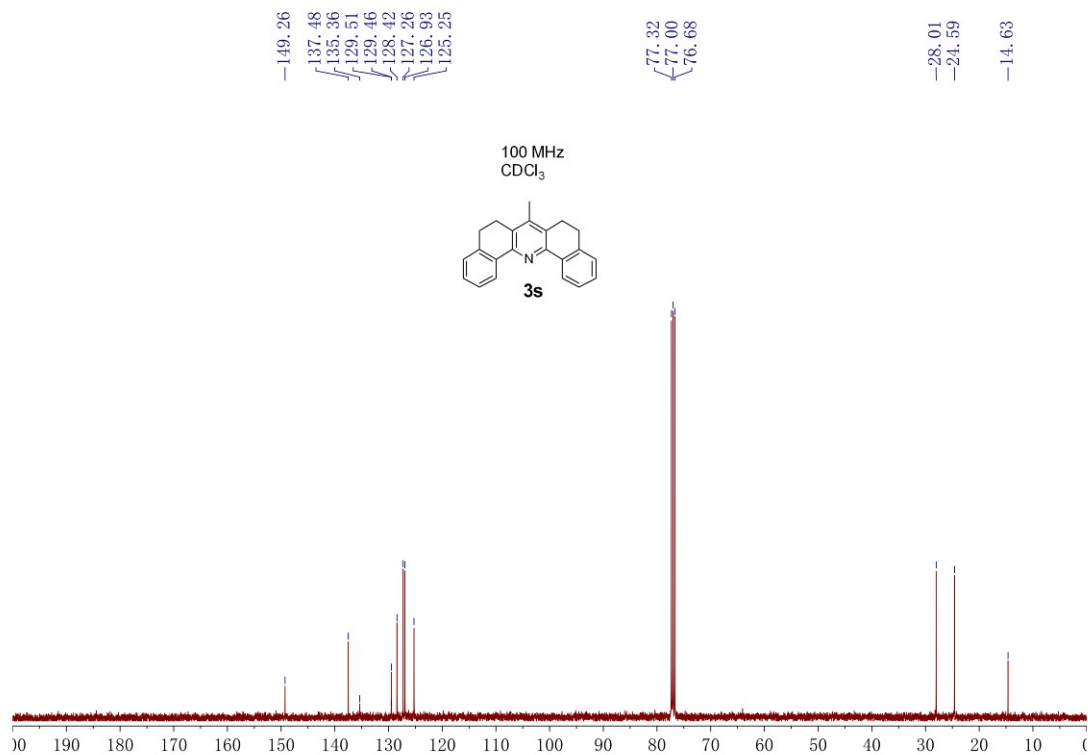

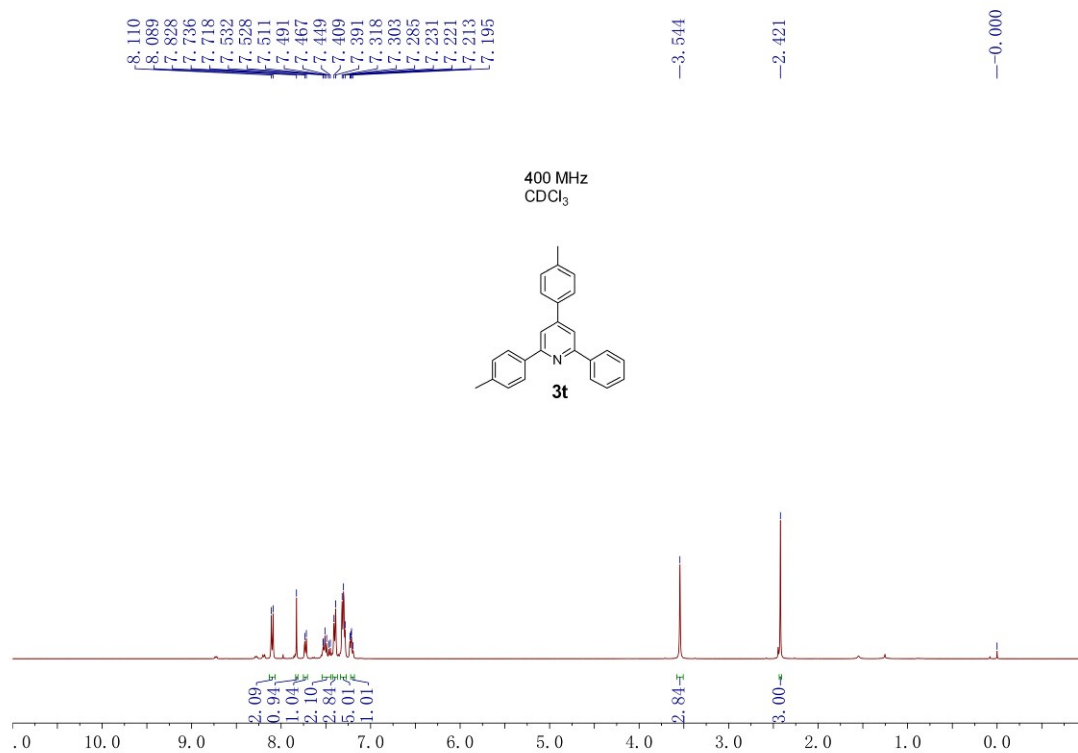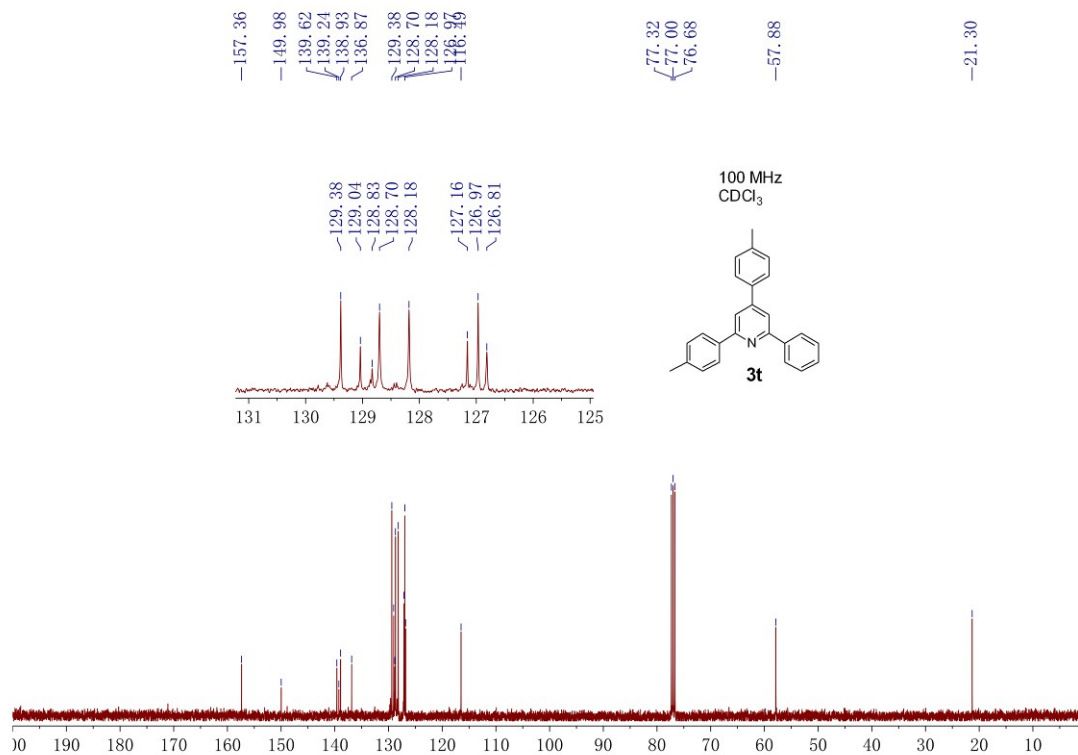

Supplement: c8ob00349a1.pdf [file c8ob00349a1.pdf]
